# Supplementary material for: Environmental deformations dynamically shift the grid cell spatial metric
Source: eLife journal article supplement (doi:10.7554/elife.38169), 2018-10-22
Supplement: supp [file elife-38169-supp-v1.zip]

Archive with 12 entries (12 files):
- elife_poa_e38169_Figure_5_figure_supplement_1.tif
- elife_poa_e38169_Figure_3_source_data_2.xls
- elife_poa_e38169_Figure_2_figure_supplement_1.tif
- elife_poa_e38169_Figure_5_figure_supplement_3.tif
- elife_poa_e38169_Figure_2_source_data_1.xls
- elife_poa_e38169_Figure_3_source_data_4.xls
- elife_poa_e38169_Figure_3_figure_supplement_1.tif
- elife_poa_e38169_Figure_2_source_data_2.xls
- elife_poa_e38169_Figure_5_figure_supplement_2.tif
- elife_poa_e38169_Figure_3_source_data_3.xls
- elife_poa_e38169_Transparent_Reporting_File.pdf
- elife_poa_e38169_Figure_3_source_data_1.xls
