# Supplementary material for: Environmental deformations dynamically shift the grid cell spatial metric
Source: eLife journal article supplement (doi:10.7554/elife.38169), 2018-10-22
Supplement: supp [file elife-38169-supp-v1.zip › elife_poa_e38169_Figure_2_source_data_1.xls]

## Sheet: Sheet1
Dataset	Familiar environment	Grid Scale		Shift / (Scale / 2)									Normalized Rescaling				Shuffled Control Shift / (Scale / 2)
			Deformation:	1st Familiar	East-West		North-South		Both		2nd Familiar		East-West	North-South	Both		1st Familiar	East-West		North-South		Both		2nd Familiar
			Measurement Axis:	Both	North-South	East-West	North-South	East-West	North-South	East-West	Both		East-West	North-South	North-South	East-West	Both	North-South	East-West	North-South	East-West	North-South	East-West	Both
Stensola et al 2012	Familiar Square	56.0362		0.172727	0.227273	0.159091					0.170909		0				0.165455	0.191818	0.0518182					0.255
Stensola et al 2012	Familiar Square	52.8683		0.176	0.21	0.412					0.2355		-0.196721				0.17	0.207	0.141					0.283
Stensola et al 2012	Familiar Square	49.6988			0.315556	0.185556					0.110556		0.0983607					0.285556	0.0888889					0.174444
Stensola et al 2012	Familiar Square	72.8026		0.151071	0.153571	0.146429					0.170357		-0.196721				0.196071	0.189286	0.182857					0.2425
Stensola et al 2012	Familiar Square	60.7599		0.295833	0.254167	0.260833					0.27125		0.0983607				0.228333	0.149167	0.209167					0.23125
Stensola et al 2012	Familiar Square	63.1513		0.225	0.2575	0.235833					0.163333		1.08197				0.2075	0.211667	0.213333					0.201667
Stensola et al 2012	Familiar Square	61.4215		0.194167	0.106667	0.483333					0.12		1.18033				0.193333	0.34	0.275					0.19125
Stensola et al 2012	Familiar Square	59.9658		0.239091	0.221818	0.265455					0.282727		1.18033				0.294545	0.237273	0.317273					0.268182
Stensola et al 2012	Familiar Square	81.814		0.2025	0.23625	0.4725							1.08197				0.25375	0.260625	0.318125
Stensola et al 2012	Familiar Square	48.1713		0.214444	0.142222	0.245556					0.222222		0.0983607				0.314444	0.187778	0.202222					0.128333
Stensola et al 2012	Familiar Square	47.7145		0.254444	0.166667	0.25					0.259444		0.0983607				0.221111	0.182222	0.213333					0.211667
Stensola et al 2012	Familiar Square	52.6246		0.33	0.368	0.128					0.285		-0.196721				0.2475	0.26	0.314					0.266
Stensola et al 2012	Familiar Square	48.2789		0.17	0.388889	0.378889					0.272222		0.0983607				0.207222	0.28	0.265556					0.227222
Stensola et al 2012	Familiar Square	49.2763		0.273889	0.316667	0.438889					0.294444		0.0983607				0.236667	0.261111	0.138889					0.233333
Stensola et al 2012	Familiar Square	49.107		0.257222	0.323333	0.36					0.367778		1.08197				0.292222	0.391111	0.323333					0.296667
Stensola et al 2012	Familiar Square	49.2535		0.317222	0.316667	0.302222					0.303889		0.295082				0.250556	0.321111	0.303333					0.276667
Stensola et al 2012	Familiar Square	53.98		0.189	0.2	0.347					0.165		0.295082				0.2465	0.331	0.306					0.1985
Stensola et al 2012	Familiar Square	108.087		0.0788095	0.149048	0.280952					0.159048		0.885246				0.125238	0.0866667	0.0842857					0.133571
Stensola et al 2012	Familiar Square	105.542		0.0954762	0.311429	0.28381					0.189286		0.786885				0.152143	0.210476	0.187619					0.131905
Stensola et al 2012	Familiar Square	109.617		0.196905	0.208571	0.0366667					0.225		0.885246				0.138095	0.159048	0.167619					0.16619
Stensola et al 2012	Familiar Square	112.241		0.245	0.193636	0.188636							1.18033				0.197045	0.188636	0.105909
Stensola et al 2012	Familiar Square	62.7783		0.30375	0.24	0.271667					0.16		0.0983607				0.224167	0.243333	0.304167					0.21
Stensola et al 2012	Familiar Square	81.5527		0.199063	0.2825	0.295625					0.35375		0.885246				0.214687	0.22625	0.275625					0.264687
Stensola et al 2012	Familiar Square	131.488		0.205577	0.130769	0.153846					0.152692		0.885246				0.201346	0.165	0.185769					0.176346
Stensola et al 2012	Familiar Square	110.32		0.164773	0.21	0.205909					0.146136		1.08197				0.177273	0.193636	0.134545					0.200227
Stensola et al 2012	Familiar Square	98.3505		0.193158	0.222632	0.365263					0.208947		1.08197				0.160789	0.203684	0.283684					0.202632
Stensola et al 2012	Familiar Square	114.267		0.248182		0.138182					0.193409		0.688525				0.2125	0	0.204091					0.236818
Stensola et al 2012	Familiar Square	104.03		0.249		0.56					0.12775		0.885246				0.22825	0	0.2655					0.18825
Stensola et al 2012	Familiar Square	40.6122		0.205	0	0.30125					0.423125		0.0983607				0.214375	0	0.105					0.15
Stensola et al 2012	Familiar Square	106.296		0.182143		0.535714					0.212381		1.08197				0.177024	0	0.326667					0.120476
Stensola et al 2012	Familiar Square	114.433		0.2375	0	0.342727					0.152955		0.688525				0.232273	0	0.234545					0.125455
Stensola et al 2012	Familiar Square	117.451			0	0.236087					0.26587		1.18033					0	0.208696					0.221304
Stensola et al 2012	Familiar Square	42.4033			0	0.3475					0.33875		0.0983607					0	0.07					0.09
Stensola et al 2012	Familiar Square	42.4615			0	0.23125					0.39625		0.295082					0	0.0925					0.175625
Stensola et al 2012	Familiar Square	85.4493		0.127647	0.383529	0.567647					0.0597059		0.491803				0.118824	0.229412	0.472353					0.0461765
Stensola et al 2012	Familiar Square	46.6579		0.334444	0.222222	0.44					0.21		0				0.173889	0.348889	0.134444					0.095
Stensola et al 2012	Familiar Square	70.3466		0.203571	0.312143	0.481429					0.352857		0.0983607				0.231071	0.304286	0.454286					0.222143
Stensola et al 2012	Familiar Square	77.3631		0.258	0.166	0.284					0.336333		0				0.271	0.206	0.326					0.168667
Stensola et al 2012	Familiar Square	57.4559		0.178636	0.393636	0.277273					0.184545		0.0983607				0.266364	0.3	0.37					0.147727
Stensola et al 2012	Familiar Square	48.4538		0.322778	0.468889	0.0133333					0.233333		0				0.280556	0.41	0.165556					0.196111
Stensola et al 2012	Familiar Square	42.7854		0.3375	0.17	0.27875					0.15375		0				0.0875	0.26375	0.0275					0.0675
Stensola et al 2012	Familiar Square	80.74			0.244375	0					0.141875		0.295082					0.1575	0.008125					0.112812
Stensola et al 2012	Familiar Square	42.7075			0.17875	0.37375					0.28		0.0983607					0.18875	0.06875					0.0775
Stensola et al 2012	Familiar Square	60.9468		0.0641667	0.0975	0.515833					0.132897		0.196721				0.164167	0.24	0.1825					0.0710721
Stensola et al 2012	Familiar Square	86.2011		0.0394118	0.111765	0.321765					0.139706		0.590164				0.0779412	0.140588	0.265294					0.112626
Stensola et al 2012	Familiar Square	84.8933		0.1475	0.095625	0.278125							0.491803				0.140937	0.171875	0.306875
Stensola et al 2012	Familiar Square	82.3455		0.06125	0.21	0.235625							0.688525				0.115937	0.2275	0.2075
Stensola et al 2012	Familiar Square	61.8233		0.140417	0.344167	0.134167					0.0712672		0.393443				0.114583	0.268333	0.0791667					0.0652567
Stensola et al 2012	Familiar Square	66.5211		0.168077	0.186923	0.0746154					0.148846		0.491803				0.137692	0.225385	0.0984615					0.0796154
Stensola et al 2012	Familiar Square	57.5641		0.166364	0.148182	0.322727					0.164545		-0.0983607				0.110909	0.276364	0.309091					0.0906015
Stensola et al 2012	Familiar Square	57.7729		0.186818	0.270909	0.32					0.0977273		0.0983607				0.0909091	0.254545	0.174545					0.0639234
Barry et al 2007	Familiar Square	43.497		0.123125	0.25875	0.26625	0.10875	0.63875	0.6525	0.30625			0.97561	0.813008	0.813008	0.813008	0.24625	0.3625	0.3	0.21	0.30875	0.34125	0.385
Barry et al 2007	Familiar Square	40.5693		0.401875	0.60875	0.87875	0.78375	0.23625	0.5975	0.475	0.336875		0.813008	0.813008	0.813008	0.813008	0.38625	0.44	0.38125	0.3975	0.37625	0.38875	0.42625	0.4325
Barry et al 2007	Familiar Square	73.7614		0.367857	0.180714	0.415714	0.319286	0.654286	0.388393	0.465714	0.43		0.650407	0.650407	0.650407	0.650407	0.243214	0.262626	0.492143	0.376429	0.272857	0.273684	0.234286	0.245714
Barry et al 2007	Familiar Square	85.2306		0.216765	0.128235	0.541765	0.414118	0.246803	0.397059	0.412941	0.324706		0.650407	0.813008	0.813008	0.650407	0.231471	0.162353	0.410588	0.264118	0.19035	0.267647	0.357647	0.291765
Barry et al 2007	Familiar Square	75.685		0.569	0.292199	0.641333	0.25	0.158667	0.336	0.528	0.329667		0.813008	0	0.650407	0.487805	0.305667	0.186	0.422	0.421333	0.245333	0.308	0.362	0.279667
Barry et al 2007	Familiar Square	77.198		0.361667	0.341463	0.12	0.697333	0.265625	0.136667	0.574667	0.165		0.650407	0.650407	0.650407	0.813008	0.218333	0.23	0.179333	0.240667	0.248485	0.263333	0.436667	0.230333
Barry et al 2007	Familiar Square	69.1093		0.141154	0.314615	0.36	0.185385	0.139231	0.536154	0.422308	0.254615		1.13821	0.487805	0.487805	1.30081	0.199231	0.297692	0.290769	0.282308	0.169231	0.416923	0.370769	0.224615
Barry et al 2007	Familiar Square	67.9961		0.142692	0.316923	0.362308	0.326923	0.180769	0.238462	0.510769	0.0938462		0.97561	0.650407	0.650407	0.97561	0.263462	0.269231	0.506923	0.318462	0.290769	0.258462	0.363077	0.209615
Barry et al 2007	Familiar Square	39.0574		0.36	0.354286	0.6	0.761429	0.624286	0.431429	0.44	0.245714		0.97561	1.13821	0.813008	0.813008	0.29	0.318571	0.475714	0.368571	0.365714	0.411429	0.43	0.300714
Barry et al 2007	Familiar Square	39.9196		0.487857	0.365714	0.35	0.161429	0.181429	0.448571	0.51	0.274286		1.13821	0.813008	0.813008	0.97561	0.267857	0.412857	0.372857	0.358601	0.365714	0.511429	0.401429	0.242143
Barry et al 2007	Familiar Square	68.6088		0.215	0.462308	0.202308	0.308462	0.427692	0.273846	0.432308	0.111538		0.813008	0.650407	1.13821	0.813008	0.328077	0.376154	0.196923	0.334615	0.334615	0.276154	0.372308	0.275385
Barry et al 2007	Familiar Square	38.0324		0.264286	0.2	0.714286	0.43	0.26	0.418571	0.451429	0.145		0.813008	1.13821	0.813008	0.97561	0.197143	0.328571	0.364286	0.447143	0.261429	0.52	0.431429	0.267143
Barry et al 2007	Familiar Square	63.0321		0.4025	0.343333	0.205	0.231667	0.2575	0.606667	0.269167	0.153333		0.487805	0.97561	0.97561	0.813008	0.263333	0.4075	0.430833	0.293333	0.214167	0.51	0.295833	0.26875
Barry et al 2007	Familiar Square	53.2151		0.3775	0.3	0.307	0.823	0.267	0.461	0.51	0.1305		0.813008	1.13821	0.650407	0.813008	0.1825	0.288	0.25	0.44	0.316	0.353	0.403	0.235
Barry et al 2007	Familiar Square	34.0348		0.584167	0.245614	0.545	0.611667	0.264605	0.415	0.486667	0.541667		0.97561	0.487805	0.487805	0.813008	0.275833	0.329545	0.333333	0.36	0.386667	0.436667	0.453333	0.465
Barry et al 2007	Familiar Square	53.766		0.386	0.488	0.358	0.721	0.225	0.413	0.422	0.385		0.813008	0.813008	0.97561	1.13821	0.317	0.28	0.427	0.388	0.351	0.408	0.374	0.348217
Barry et al 2007	Familiar Square	62.9378		0.322917	0.1725	0.440833	0.600833		0.379167	0.450833	0.465417		0.813008	0.813008	0.813008	0.97561	0.150833	0.283333	0.221667	0.4125	0	0.298333	0.174167	0.26375
Barry et al 2007	Familiar Square	58.3822		0.44	0.529091	0.35	0.373636	0.135455	0.484545	0.371818	0.447727		0.813008	1.13821	0.650407	0.487805	0.336364	0.251748	0.423636	0.418182	0.359091	0.415978	0.42	0.343182
Barry et al 2007	Familiar Square	58.572		0.533182	0.165455	0.423636	0.463636	0.123636	0.497273	0.03	0.299091		0.813008	0.650407	1.13821	0.813008	0.182273	0.169091	0.199091	0.554545	0.235455	0.331818	0.329091	0.249545
Barry et al 2007	Familiar Square	49.3134		0.389444	0.711111	0.55	0.76	0.213333	0.972222	0.628889	0.484444		1.13821	1.13821	0.813008	0.650407	0.272222	0.261905	0.415556	0.331111	0.298527	0.457447	0.38945	0.294091
Barry et al 2007	Familiar Square	59.1902		0.314091	0.422727	0.475455	0.672727	0.581818	0.711818	0.529091	0.351818		0.813008	0.97561	0.650407	0.813008	0.286818	0.24	0.252727	0.527273	0.211818	0.365455	0.41	0.262273
Barry et al 2007	Familiar Square	74.3116		0.0839286	0.107143	0.330714	0.279286	0.126429	0.325	0.202143	0.05		0.97561	0.813008	0.650407	0.813008	0.0807143	0.145714	0.155714	0.409286	0.239286	0.257857	0.167143	0.110357
Barry et al 2007	Familiar Square	36.068		0.548571	0.237143	0.305714	0.711429	0.58	0.521429	0.764286	0.332857		1.13821	-0.325203	1.13821	0.813008	0.452857	0.398571	0.475714	0.375714	0.388571	0.505714	0.442857	0.365714
Barry et al 2007	Familiar Rectangle	30.2176		0.348333	0.168333	0.368333	0.586667	0.328333	0.333333	0.48	0.554167		0.813008	0.482759	0.643678	-0.162602	0.358333	0.365	0.311448	0.391667	0.402357	0.343333	0.44	0.411667
Barry et al 2007	Familiar Rectangle	30.8181		0.208077	0.521667	0.448333	0.28	0.385	0.66	0.171667	0.2475		0.162602	0.804598	1.28736	0.162602	0.213695	0.305	0.29	0.316667	0.335	0.42	0.186667	0.111667
Barry et al 2007	Familiar Rectangle	30.5784		0.289413	0.583333	0.638333	0.446667	0.451667	0.513333	0.263333	0.285		0.325203	0.804598	0.321839	0.325203	0.267366	0.518333	0.438333	0.423333	0.438333	0.481667	0.521667	0.210833
Barry et al 2007	Familiar Rectangle	30.3442		0.1925	0.61	0.6	0.46	0.286667	0.31	0.516667	0.191667		0.487805	0.965517	1.28736	0.487805	0.217449	0.293333	0.56	0.408333	0.46633	0.285	0.463333	0.151667
Barry et al 2007	Familiar Rectangle	31.0498		0.255833	0.393333	0.346667	0.16	0.61	0.09	0.0366667	0.31		0	-0.321839	-0.321839	-0.325203	0.273333	0.29	0.373333	0.201667	0.42	0.305	0.38	0.469167
Barry et al 2007	Familiar Rectangle	33.1312		0.279167	0.266667	0.596667	0.39	0.368333	0.191667	0.325	0.125		1.13821	0.965517	0.643678	0.97561	0.421667	0.383333	0.356667	0.38	0.408333	0.288333	0.513333	0.263837
Barry et al 2007	Familiar Rectangle	30.3129		0.0408333	0.703333	0.198333	0.36	0.193333	0.501667	0.155	0.333333		1.13821	0.804598	0.482759	-0.325203	0.130833	0.505	0.268333	0.365	0.316667	0.365	0.308333	0.364167
Barry et al 2007	Familiar Rectangle	32.2111		0.243333	0.291667	0.856667	0.145	0.0816667	0.595	0.778333	0.539167		-0.325203	0.804598	0.643678	0.162602	0.389167	0.498333	0.39	0.435	0.32	0.405	0.421667	0.4
Barry et al 2007	Familiar Rectangle	29.6344		0.377	0.384	0.564	0.254	0.16	0.434	0.346	0.244		-0.325203	0.643678	0.804598	0.162602	0.462061	0.324	0.396	0.268	0.342	0.322	0.338	0.303
Barry et al 2007	Familiar Rectangle	63.9605		0.1475	0.475833	0.2325	0.190833	0.444167	0.631667	0.613333	0.419167		0.650407	0.804598	0.643678	0.813008	0.377083	0.469167	0.345833	0.275833	0.455833	0.356667	0.410833	0.367083
Barry et al 2007	Familiar Rectangle	70.4075		0.266071	0.239286	0.280714	0.251429	0.170714	0.552857	0.0678571	0.193214		0.325203	0.643678	0.482759	0.487805	0.315714	0.394286	0.341429	0.0321429	0.235	0.335714	0.266429	0.226429
Barry et al 2007	Familiar Rectangle	44.2857		0.57375	0.685	0.225	0.24125	0.24625		0.11875	0.60375		0.97561	0.804598	0.643678	0.97561	0.42375	0.36875	0.4475	0.35375	0.39	0.292105	0.4375	0.38125
Barry et al 2007	Familiar Rectangle	45.135		0.237222	0.167778	0.337778	0.43	0.445556		0.256667	0.457222		0.97561	0.965517	0.804598	1.13821	0.311667	0.407778	0.386667	0.338889	0.285556	0.274306	0.396667	0.317222
