# Supplementary material for: Environmental deformations dynamically shift the grid cell spatial metric
Source: eLife journal article supplement (doi:10.7554/elife.38169), 2018-10-22
Supplement: supp [file elife-38169-supp-v1.zip › elife_poa_e38169_Figure_2_source_data_2.xls]

## Sheet: Sheet1
	Deformation:	East-West		North-South		Both
Dataset	Familiar environment	West	East	South	North	West	South	East	North
Stensola et al., 2012	Familiar Square	1	1
Stensola et al., 2012	Familiar Square	0	1
Stensola et al., 2012	Familiar Square	0	1
Stensola et al., 2012	Familiar Square	0	1
Stensola et al., 2012	Familiar Square	0	1
Stensola et al., 2012	Familiar Square	1	1
Stensola et al., 2012	Familiar Square	1	1
Stensola et al., 2012	Familiar Square	1	1
Stensola et al., 2012	Familiar Square	1	1
Stensola et al., 2012	Familiar Square	1	1
Stensola et al., 2012	Familiar Square	1	0
Stensola et al., 2012	Familiar Square	1	0
Stensola et al., 2012	Familiar Square	1	0
Stensola et al., 2012	Familiar Square	1	0
Stensola et al., 2012	Familiar Square	1	1
Stensola et al., 2012	Familiar Square	1	0
Stensola et al., 2012	Familiar Square	0	0
Stensola et al., 2012	Familiar Square	1	1
Stensola et al., 2012	Familiar Square	1	1
Stensola et al., 2012	Familiar Square	0	1
Stensola et al., 2012	Familiar Square	0	1
Stensola et al., 2012	Familiar Square	1	1
Stensola et al., 2012	Familiar Square	0	1
Stensola et al., 2012	Familiar Square	1	1
Stensola et al., 2012	Familiar Square	1	1
Stensola et al., 2012	Familiar Square	0	1
Stensola et al., 2012	Familiar Square	1	1
Stensola et al., 2012	Familiar Square	1	1
Stensola et al., 2012	Familiar Square	1	1
Stensola et al., 2012	Familiar Square	1	1
Stensola et al., 2012	Familiar Square	1	1
Stensola et al., 2012	Familiar Square	1	1
Stensola et al., 2012	Familiar Square	1	1
Stensola et al., 2012	Familiar Square	1	1
Stensola et al., 2012	Familiar Square	1	1
Stensola et al., 2012	Familiar Square	0	1
Stensola et al., 2012	Familiar Square	0	1
Stensola et al., 2012	Familiar Square	0	1
Stensola et al., 2012	Familiar Square	0	1
Stensola et al., 2012	Familiar Square	0	1
Stensola et al., 2012	Familiar Square	1	1
Stensola et al., 2012	Familiar Square	0	1
Stensola et al., 2012	Familiar Square	1	1
Stensola et al., 2012	Familiar Square	1	1
Stensola et al., 2012	Familiar Square	1	0
Stensola et al., 2012	Familiar Square	1	0
Stensola et al., 2012	Familiar Square	1	0
Stensola et al., 2012	Familiar Square	1	0
Stensola et al., 2012	Familiar Square	1	0
Stensola et al., 2012	Familiar Square	1	0
Stensola et al., 2012	Familiar Square	1	0
Barry et al., 2007	Familiar Square	1	1	1	1	1	1	1	1
Barry et al., 2007	Familiar Square	1	1	1	1	1	1	0	1
Barry et al., 2007	Familiar Square	0	0	1	1	1	1	1	1
Barry et al., 2007	Familiar Square	0	1	1	0	1	1	1	0
Barry et al., 2007	Familiar Square	1	1	1	0	1	1	1	0
Barry et al., 2007	Familiar Square	1	0	0	0	1	0	1	0
Barry et al., 2007	Familiar Square	1	1	1	0	1	1	1	0
Barry et al., 2007	Familiar Square	1	1	1	0	1	1	1	0
Barry et al., 2007	Familiar Square	1	1	1	1	1	1	1	1
Barry et al., 2007	Familiar Square	1	1	1	1	1	1	1	1
Barry et al., 2007	Familiar Square	1	1	1	0	1	1	1	0
Barry et al., 2007	Familiar Square	1	1	1	1	1	1	1	1
Barry et al., 2007	Familiar Square	1	0	1	1	1	0	1	1
Barry et al., 2007	Familiar Square	1	1	1	1	1	1	1	1
Barry et al., 2007	Familiar Square	1	1	1	1	1	1	1	1
Barry et al., 2007	Familiar Square	1	1	1	1	1	1	1	1
Barry et al., 2007	Familiar Square	1	1	1	1	1	1	1	1
Barry et al., 2007	Familiar Square	1	1	1	1	0	1	1	1
Barry et al., 2007	Familiar Square	1	1	1	0	1	1	1	0
Barry et al., 2007	Familiar Square	1	1	1	1	1	1	1	1
Barry et al., 2007	Familiar Square	1	1	1	1	1	1	1	1
Barry et al., 2007	Familiar Square	1	1	1	1	1	1	1	1
Barry et al., 2007	Familiar Square	1	1	1	1	1	1	0	1
Barry et al., 2007	Familiar Rectangle	1	0	1	1	1	1	0	1
Barry et al., 2007	Familiar Rectangle	1	1	1	1	1	1	1	1
Barry et al., 2007	Familiar Rectangle	1	1	1	1	1	0	1	1
Barry et al., 2007	Familiar Rectangle	1	0	1	1	1	1	1	1
Barry et al., 2007	Familiar Rectangle	0	1	1	1	0	1	1	1
Barry et al., 2007	Familiar Rectangle	1	1	1	1	1	0	1	1
Barry et al., 2007	Familiar Rectangle	1	0	1	1	1	0	0	1
Barry et al., 2007	Familiar Rectangle	1	1	1	1	1	0	0	1
Barry et al., 2007	Familiar Rectangle	0	1	0	1	1	0	1	1
Barry et al., 2007	Familiar Rectangle	1	1	1	0	1	1	1	0
Barry et al., 2007	Familiar Rectangle	0	1	0	0	0	0	1	0
Barry et al., 2007	Familiar Rectangle	1	1	1	1	1	1	1	1
Barry et al., 2007	Familiar Rectangle	1	0	1	1	1	1	1	1
