# Supplementary material for: Environmental deformations dynamically shift the grid cell spatial metric
Source: eLife journal article supplement (doi:10.7554/elife.38169), 2018-10-22
Supplement: supp [file elife-38169-supp-v1.zip › elife_poa_e38169_Figure_3_source_data_1.xls]

## Sheet: Sheet1
Dataset	Familiar environment	Boundary-conditioned	Whole-trial	Sampling-equated whole-trial
Stensola et al., 2012	Familiar Square	0.0983607	-0.0491803	0.0983607
Stensola et al., 2012	Familiar Square	0.491803	0.0491803	0.0491803
Stensola et al., 2012	Familiar Square	0.0983607	0.639344	0.836066
Stensola et al., 2012	Familiar Square	0.393443	0	-0.147541
Stensola et al., 2012	Familiar Square	0.491803	0.639344	0.639344
Stensola et al., 2012	Familiar Square	0.0983607	0.491803	0.688525
Stensola et al., 2012	Familiar Square	0.245902	0.934426	0.245902
Stensola et al., 2012	Familiar Square	0.491803	1.03279	0.836066
Stensola et al., 2012	Familiar Square	0.393443	0.540984	0.491803
Stensola et al., 2012	Familiar Square	-0.147541	0	-0.0491803
Stensola et al., 2012	Familiar Square	0	0.147541	0.147541
Stensola et al., 2012	Familiar Square	0.0983607	0.0983607	0.0983607
Stensola et al., 2012	Familiar Square	-0.147541	0.0983607	0.0983607
Stensola et al., 2012	Familiar Square	-0.147541	0	0.0491803
Stensola et al., 2012	Familiar Square	0.344262	1.03279	0.934426
Stensola et al., 2012	Familiar Square	0.737705	0.0983607	0.147541
Stensola et al., 2012	Familiar Square	0.590164	0.147541	0.786885
Stensola et al., 2012	Familiar Square	0.639344	0.983607	0.737705
Stensola et al., 2012	Familiar Square	0.491803	0.934426	1.13115
Stensola et al., 2012	Familiar Square	0.836066	0.983607	0.786885
Stensola et al., 2012	Familiar Square	0.688525	0.786885	0.688525
Stensola et al., 2012	Familiar Square	0.442623	0.590164	0.639344
Stensola et al., 2012	Familiar Square	0.688525	0.983607	0.934426
Stensola et al., 2012	Familiar Square	0.245902	1.03279	0.934426
Stensola et al., 2012	Familiar Square	0.540984	1.03279	0.786885
Stensola et al., 2012	Familiar Square	1.13115	1.03279	1.13115
Stensola et al., 2012	Familiar Square	0.344262	0.934426	0.688525
Stensola et al., 2012	Familiar Square	0.540984	0.983607	0.836066
Stensola et al., 2012	Familiar Square	-0.0491803	0.196721	0
Stensola et al., 2012	Familiar Square	0.245902	0.983607	0.491803
Stensola et al., 2012	Familiar Square	0.786885	0.786885	0.836066
Stensola et al., 2012	Familiar Square	0.590164	1.03279	0.590164
Stensola et al., 2012	Familiar Square	-0.0983607	0.147541	-0.0983607
Stensola et al., 2012	Familiar Square	0.0491803	0.295082	0.0983607
Stensola et al., 2012	Familiar Square	0.688525	0.836066	0.590164
Stensola et al., 2012	Familiar Square	-0.196721	0.147541	-0.0491803
Stensola et al., 2012	Familiar Square	0	-0.0491803	0.0983607
Stensola et al., 2012	Familiar Square	-0.0983607	-0.0983607	-0.196721
Stensola et al., 2012	Familiar Square	0	-0.0491803	-0.0491803
Stensola et al., 2012	Familiar Square	0.0983607	0.0983607	0.0983607
Stensola et al., 2012	Familiar Square	-0.0491803	0.196721	0.0983607
Stensola et al., 2012	Familiar Square	0.688525	0.737705	0.737705
Stensola et al., 2012	Familiar Square	0	0.196721	0
Stensola et al., 2012	Familiar Square	-0.0983607	0	0.0983607
Stensola et al., 2012	Familiar Square	0.786885	0.885246	0.934426
Stensola et al., 2012	Familiar Square	0.737705	0.836066	1.03279
Stensola et al., 2012	Familiar Square	0.934426	0.934426	0.934426
Stensola et al., 2012	Familiar Square	0.737705	0.737705	0.836066
Stensola et al., 2012	Familiar Square	0.737705	0.836066	0.836066
Stensola et al., 2012	Familiar Square	0.885246	0.540984	-0.0491803
Stensola et al., 2012	Familiar Square	0.442623	0.590164	0.491803
Barry et al., 2007	Familiar Square	0.894309	0.97561	1.05691
Barry et al., 2007	Familiar Square	0.97561	0.97561	0.813008
Barry et al., 2007	Familiar Square	0.569106	0.97561	0.813008
Barry et al., 2007	Familiar Square	1.05691	1.05691	1.05691
Barry et al., 2007	Familiar Square	0.569106	0.894309	0.731707
Barry et al., 2007	Familiar Square	0.731707	0.894309	0.97561
Barry et al., 2007	Familiar Square	1.13821	0.813008	1.30081
Barry et al., 2007	Familiar Square	0.406504	0.894309	0.325203
Barry et al., 2007	Familiar Square	0.731707	0.97561	0.731707
Barry et al., 2007	Familiar Square	0.569106	0.813008	0.731707
Barry et al., 2007	Familiar Square	0.243902	0.813008	0.97561
Barry et al., 2007	Familiar Square	0.650407	0.894309	0.97561
Barry et al., 2007	Familiar Square	0.894309	0.97561	1.13821
Barry et al., 2007	Familiar Square	0.97561	0.813008	1.05691
Barry et al., 2007	Familiar Square	0.650407	0.894309	0.97561
Barry et al., 2007	Familiar Square	1.13821	0.894309	1.13821
Barry et al., 2007	Familiar Square	0.813008	0.97561	1.05691
Barry et al., 2007	Familiar Square	0.97561	0.406504	1.13821
Barry et al., 2007	Familiar Square	0.406504	0.894309	0.813008
Barry et al., 2007	Familiar Square	1.21951	0.97561	0.487805
Barry et al., 2007	Familiar Square	0.97561	0.97561	1.13821
Barry et al., 2007	Familiar Square	1.05691	0.97561	1.05691
Barry et al., 2007	Familiar Square	0.97561	0.894309	0.97561
Barry et al., 2007	Familiar Square	1.13821	0.97561	1.13821
Barry et al., 2007	Familiar Square	0.487805	1.05691	0.894309
Barry et al., 2007	Familiar Square	0.731707	0.894309	0.97561
Barry et al., 2007	Familiar Square	0.813008	1.13821	0.97561
Barry et al., 2007	Familiar Square	0.731707	0.813008	0.894309
Barry et al., 2007	Familiar Square	0.650407	0.97561	0.894309
Barry et al., 2007	Familiar Square	0.813008	0.894309	0.813008
Barry et al., 2007	Familiar Square	0.487805	0.97561	0.97561
Barry et al., 2007	Familiar Square	0.650407	0.894309	0.894309
Barry et al., 2007	Familiar Square	0.650407	0.97561	0.894309
Barry et al., 2007	Familiar Square	0.487805	1.05691	0.731707
Barry et al., 2007	Familiar Square	0.569106	0.894309	1.05691
Barry et al., 2007	Familiar Square	0.731707	0.894309	0.731707
Barry et al., 2007	Familiar Square	0.731707	1.05691	0.813008
Barry et al., 2007	Familiar Square	0.650407	0.894309	0.731707
Barry et al., 2007	Familiar Square	0.731707	0.97561	0.97561
Barry et al., 2007	Familiar Square	0.813008	0.894309	0.894309
Barry et al., 2007	Familiar Square	0.487805	0.894309	1.05691
Barry et al., 2007	Familiar Square	0.731707	0.97561	0.813008
Barry et al., 2007	Familiar Square	0.731707	0.97561	1.05691
Barry et al., 2007	Familiar Square	0.731707	0.97561	1.21951
Barry et al., 2007	Familiar Square	0.650407	0.894309	0.813008
Barry et al., 2007	Familiar Square	0.650407	0.97561	0.97561
Barry et al., 2007	Familiar Square	0.650407	0.97561	0.894309
Barry et al., 2007	Familiar Square	0.894309	0.894309	1.13821
Barry et al., 2007	Familiar Square	0.731707	0.894309	0.813008
Barry et al., 2007	Familiar Square	0.731707	0.97561	0.894309
Barry et al., 2007	Familiar Square	0.813008	0.97561	0.97561
Barry et al., 2007	Familiar Square	1.21951	0.97561	1.05691
Barry et al., 2007	Familiar Square	0.650407	0.97561	0.97561
Barry et al., 2007	Familiar Square	0.406504	1.05691	0.894309
Barry et al., 2007	Familiar Square	0.569106	0.97561	1.05691
Barry et al., 2007	Familiar Square	0.569106	0.97561	1.05691
Barry et al., 2007	Familiar Square	0.731707	0.97561	0.894309
Barry et al., 2007	Familiar Square	0.894309	0.894309	0.97561
Barry et al., 2007	Familiar Square	0.650407	0.813008	0.813008
Barry et al., 2007	Familiar Square	1.05691	0.894309	1.13821
Barry et al., 2007	Familiar Square	0.731707	0.97561	1.05691
Barry et al., 2007	Familiar Square	0.731707	0.894309	0.97561
Barry et al., 2007	Familiar Square	0.894309	0.894309	1.05691
Barry et al., 2007	Familiar Square	0.569106	0.97561	0.813008
Barry et al., 2007	Familiar Square	0.731707	0.894309	1.13821
Barry et al., 2007	Familiar Square	0.243902	0.894309	0.97561
Barry et al., 2007	Familiar Square	0.650407	0.97561	1.05691
Barry et al., 2007	Familiar Square	0.813008	0.97561	0.97561
Barry et al., 2007	Familiar Square	0.325203	0.813008	0.569106
Barry et al., 2007	Familiar Square	0.813008	0.97561	1.05691
Barry et al., 2007	Familiar Square	-1.94289e-16	0.731707	0.894309
Barry et al., 2007	Familiar Square	0.97561	0.650407	1.30081
Barry et al., 2007	Familiar Square	0.650407	0.97561	0.97561
Barry et al., 2007	Familiar Square	0.406504	0.894309	0.813008
Barry et al., 2007	Familiar Square	0.894309	0.894309	0.97561
Barry et al., 2007	Familiar Square	0.650407	0.97561	1.05691
Barry et al., 2007	Familiar Square	0	1.05691	0.0813008
Barry et al., 2007	Familiar Square	0.97561	1.05691	0.731707
Barry et al., 2007	Familiar Square	0.650407	0.894309	0.487805
Barry et al., 2007	Familiar Square	0.487805	1.05691	0.487805
Barry et al., 2007	Familiar Square	0.569106	0.894309	0.813008
Barry et al., 2007	Familiar Square	0.243902	0.97561	0.97561
Barry et al., 2007	Familiar Square	0.406504	0.894309	0.97561
Barry et al., 2007	Familiar Square	0.325203	0.894309	0.894309
Barry et al., 2007	Familiar Square	0.569106	0.97561	1.05691
Barry et al., 2007	Familiar Square	0.650407	0.894309	0.97561
Barry et al., 2007	Familiar Square	0.813008	0.894309	0.97561
Barry et al., 2007	Familiar Square	0.650407	0.813008	1.05691
Barry et al., 2007	Familiar Square	0.325203	1.05691	0.813008
Barry et al., 2007	Familiar Square	0.569106	0.406504	0.813008
Barry et al., 2007	Familiar Square	0.325203	1.05691	0.650407
Barry et al., 2007	Familiar Square	0.243902	1.05691	0.243902
Barry et al., 2007	Familiar Rectangle	0.731707	0.894309	0.894309
Barry et al., 2007	Familiar Rectangle	0.804598	0.724138	0.724138
Barry et al., 2007	Familiar Rectangle	0.569106	0.325203	0.162602
Barry et al., 2007	Familiar Rectangle	0.482759	0.643678	0.482759
Barry et al., 2007	Familiar Rectangle	-1.66533e-16	0	0.97561
Barry et al., 2007	Familiar Rectangle	0.724138	0.885057	0.965517
Barry et al., 2007	Familiar Rectangle	-0.0813008	0	0.0813008
Barry et al., 2007	Familiar Rectangle	-0.241379	0.885057	0.0804598
Barry et al., 2007	Familiar Rectangle	0.325203	0.650407	0.487805
Barry et al., 2007	Familiar Rectangle	0.965517	0.885057	0.885057
Barry et al., 2007	Familiar Rectangle	-0.0813008	0.813008	-0.0813008
Barry et al., 2007	Familiar Rectangle	0.804598	0.804598	0.885057
Barry et al., 2007	Familiar Rectangle	0.650407	0.731707	0.97561
Barry et al., 2007	Familiar Rectangle	0.885057	0.965517	0.804598
Barry et al., 2007	Familiar Rectangle	1.13821	0.813008	1.13821
Barry et al., 2007	Familiar Rectangle	0.0804598	1.12644	0.321839
Barry et al., 2007	Familiar Rectangle	0	0	0.406504
Barry et al., 2007	Familiar Rectangle	0.0804598	0.0804598	0
Barry et al., 2007	Familiar Rectangle	-0.162602	-0.243902	-0.162602
Barry et al., 2007	Familiar Rectangle	0.482759	0.16092	0
Barry et al., 2007	Familiar Rectangle	0.162602	1.05691	0.97561
Barry et al., 2007	Familiar Rectangle	0.804598	0.965517	0.724138
Barry et al., 2007	Familiar Rectangle	0.243902	0.97561	0.487805
Barry et al., 2007	Familiar Rectangle	0.885057	0.885057	1.28736
Barry et al., 2007	Familiar Rectangle	0.325203	0.731707	0.894309
Barry et al., 2007	Familiar Rectangle	0.804598	0.885057	1.04598
Barry et al., 2007	Familiar Rectangle	0.325203	-0.162602	0.243902
Barry et al., 2007	Familiar Rectangle	0	0.643678	-0.0804598
Barry et al., 2007	Familiar Rectangle	0.162602	-1.66533e-16	-0.162602
Barry et al., 2007	Familiar Rectangle	0.804598	0.885057	0.724138
Barry et al., 2007	Familiar Rectangle	-0.0813008	0.650407	-0.162602
Barry et al., 2007	Familiar Rectangle	-0.321839	0.804598	-0.321839
Barry et al., 2007	Familiar Rectangle	0	0.487805	-0.0813008
Barry et al., 2007	Familiar Rectangle	0.724138	0.563218	0.643678
Barry et al., 2007	Familiar Rectangle	0.325203	0.569106	0.162602
Barry et al., 2007	Familiar Rectangle	0.482759	1.04598	0.482759
Barry et al., 2007	Familiar Rectangle	0.243902	0.813008	1.05691
Barry et al., 2007	Familiar Rectangle	1.28736	0.804598	1.04598
Barry et al., 2007	Familiar Rectangle	0.487805	0.894309	0.97561
Barry et al., 2007	Familiar Rectangle	0.885057	0.804598	1.04598
Barry et al., 2007	Familiar Rectangle	0.650407	0.731707	0.813008
Barry et al., 2007	Familiar Rectangle	1.04598	0.804598	0.724138
Barry et al., 2007	Familiar Rectangle	0.813008	0.894309	0.731707
Barry et al., 2007	Familiar Rectangle	1.28736	0.804598	1.28736
Barry et al., 2007	Familiar Rectangle	0.97561	0.97561	0.97561
Barry et al., 2007	Familiar Rectangle	0.804598	0.965517	0.643678
Barry et al., 2007	Familiar Rectangle	0.813008	0.97561	0.97561
Barry et al., 2007	Familiar Rectangle	0.965517	0.885057	0.885057
Barry et al., 2007	Familiar Rectangle	0.813008	0.97561	0.97561
Barry et al., 2007	Familiar Rectangle	0.885057	0.965517	1.2069
Barry et al., 2007	Familiar Rectangle	0.813008	1.05691	0.97561
Barry et al., 2007	Familiar Rectangle	0.724138	0.885057	0.804598
