# Supplementary material for: Environmental deformations dynamically shift the grid cell spatial metric
Source: eLife journal article supplement (doi:10.7554/elife.38169), 2018-10-22
Supplement: supp [file elife-38169-supp-v1.zip › elife_poa_e38169_Figure_3_source_data_2.xls]

## Sheet: Sheet1
			Deformation Trials
Dataset	Familiar environment	1st Familiar	Undeformed Dimensions	Deformed Dimensions	2nd Familiar
Stensola et al., 2012	Familiar Square	11	23	77	15
Stensola et al., 2012	Familiar Square	12	11	15	12
Stensola et al., 2012	Familiar Square		9	23	13
Stensola et al., 2012	Familiar Square	15	11	13	40
Stensola et al., 2012	Familiar Square	15	13	15	15
Stensola et al., 2012	Familiar Square	14	11	11	14
Stensola et al., 2012	Familiar Square	14	13	13	15
Stensola et al., 2012	Familiar Square	14	11	13	15
Stensola et al., 2012	Familiar Square	16	13	15
Stensola et al., 2012	Familiar Square	12	11	13	11
Stensola et al., 2012	Familiar Square	11	11	11	11
Stensola et al., 2012	Familiar Square	14	13	13	14
Stensola et al., 2012	Familiar Square	11	11	13	13
Stensola et al., 2012	Familiar Square	12	11	15	13
Stensola et al., 2012	Familiar Square	12	117	55	15
Stensola et al., 2012	Familiar Square	11	11	11	12
Stensola et al., 2012	Familiar Square	13	11	13	12
Stensola et al., 2012	Familiar Square	22	19	21	23
Stensola et al., 2012	Familiar Square	21	19	25	23
Stensola et al., 2012	Familiar Square	20	21	19	24
Stensola et al., 2012	Familiar Square	24	23	15
Stensola et al., 2012	Familiar Square	19	19	45	17
Stensola et al., 2012	Familiar Square	76	17	19	22
Stensola et al., 2012	Familiar Square	32	27	27	36
Stensola et al., 2012	Familiar Square	23	23	19	27
Stensola et al., 2012	Familiar Square	25	25	19	20
Stensola et al., 2012	Familiar Square	24	19	23	29
Stensola et al., 2012	Familiar Square	25	19	23	26
Stensola et al., 2012	Familiar Square	59	15	61	12
Stensola et al., 2012	Familiar Square	24	25	79	26
Stensola et al., 2012	Familiar Square	25	21	79	29
Stensola et al., 2012	Familiar Square		19	25	24
Stensola et al., 2012	Familiar Square		9	11	11
Stensola et al., 2012	Familiar Square		13	11	52
Stensola et al., 2012	Familiar Square	19	23	79	21
Stensola et al., 2012	Familiar Square	12	11	13	14
Stensola et al., 2012	Familiar Square	17	55	73	19
Stensola et al., 2012	Familiar Square	17	23	13	16
Stensola et al., 2012	Familiar Square	15	13	15	14
Stensola et al., 2012	Familiar Square	13	111	37	11
Stensola et al., 2012	Familiar Square	11	9	11	11
Stensola et al., 2012	Familiar Square		21	23	22
Stensola et al., 2012	Familiar Square		9	11	12
Stensola et al., 2012	Familiar Square	17	17	11	14
Stensola et al., 2012	Familiar Square	19	23	15	22
Stensola et al., 2012	Familiar Square	22	83	79
Stensola et al., 2012	Familiar Square	20	19	21
Stensola et al., 2012	Familiar Square	14	23	77	15
Stensola et al., 2012	Familiar Square	16	17	55	17
Stensola et al., 2012	Familiar Square	14	23	69	13
Stensola et al., 2012	Familiar Square	14	15	49	14
Barry et al., 2007	Familiar Square	11	11	25.5	12
Barry et al., 2007	Familiar Square	10	10	10.5	10
Barry et al., 2007	Familiar Square	17	18	14	16
Barry et al., 2007	Familiar Square	16	17	15.5	17
Barry et al., 2007	Familiar Square	17	21	35	20
Barry et al., 2007	Familiar Square	16	21	17	16
Barry et al., 2007	Familiar Square
Barry et al., 2007	Familiar Square
Barry et al., 2007	Familiar Square	15	16	14.5	16
Barry et al., 2007	Familiar Square	16	16	13.5	15
Barry et al., 2007	Familiar Square
Barry et al., 2007	Familiar Square	11	14	20.5	11
Barry et al., 2007	Familiar Square	12	12	10	11
Barry et al., 2007	Familiar Square	16	16	12.5	16
Barry et al., 2007	Familiar Square	9	10	14.5	9
Barry et al., 2007	Familiar Square	16	16	12	16
Barry et al., 2007	Familiar Square	13	18	24	13
Barry et al., 2007	Familiar Square	9	78	35	10
Barry et al., 2007	Familiar Square	41	12	12	40
Barry et al., 2007	Familiar Square	17	19	24	15
Barry et al., 2007	Familiar Square	17	26	51	19
Barry et al., 2007	Familiar Square	15	20	35	15
Barry et al., 2007	Familiar Square	15	29	54.5	71
Barry et al., 2007	Familiar Square	14	18	23.5	14
Barry et al., 2007	Familiar Square	13	13	12.5	14
Barry et al., 2007	Familiar Square	11	12	40	10
Barry et al., 2007	Familiar Square
Barry et al., 2007	Familiar Rectangle	8	7	11	9
Barry et al., 2007	Familiar Rectangle
Barry et al., 2007	Familiar Rectangle
Barry et al., 2007	Familiar Rectangle	9	11	9	10
Barry et al., 2007	Familiar Rectangle	9	9	9	8
Barry et al., 2007	Familiar Rectangle	7	9	9	9
Barry et al., 2007	Familiar Rectangle	9	17	21	20
Barry et al., 2007	Familiar Rectangle	57	17	23	10
Barry et al., 2007	Familiar Rectangle	9	29	9	9
Barry et al., 2007	Familiar Rectangle
Barry et al., 2007	Familiar Rectangle	9	19	23	9
Barry et al., 2007	Familiar Rectangle	8	7	9	7
Barry et al., 2007	Familiar Rectangle
Barry et al., 2007	Familiar Rectangle	16	13	13	15
Barry et al., 2007	Familiar Rectangle	17	15	13	34
Barry et al., 2007	Familiar Rectangle	12	17	29	12
Barry et al., 2007	Familiar Rectangle	12	11	11	12
Barry et al., 2007	Familiar Rectangle
