# Supplementary material for: Environmental deformations dynamically shift the grid cell spatial metric
Source: eLife journal article supplement (doi:10.7554/elife.38169), 2018-10-22
Supplement: supp [file elife-38169-supp-v1.zip › elife_poa_e38169_Figure_3_source_data_3.xls]

## Sheet: Sheet1
Dataset	Familiar environment		Peak Firing Rate						Mean Firing Rate
		Deformation:	1st Familiar	East-West	North-South	Both	2nd Familiar		1st Familiar	East-West	North-South	Both	2nd Familiar
Stensola et al 2012	Familiar Square		13.8761	12.6546			11.6372		4.01554	4.05078			2.9993
Stensola et al 2012	Familiar Square		17.0604	8.91654			12.4966		2.36627	1.96065			2.07181
Stensola et al 2012	Familiar Square			12.4987			13.923			3.33635			4.12103
Stensola et al 2012	Familiar Square		14.1007	6.94603			11.2428		1.47083	0.698604			1.12642
Stensola et al 2012	Familiar Square		24.5588	14.6093			16.545		1.33288	1.69752			1.54275
Stensola et al 2012	Familiar Square		12.3324	10.7105			12.3306		3.16801	1.72933			1.50972
Stensola et al 2012	Familiar Square		16.0736	10.2795			24.9236		1.54175	1.63517			3.28192
Stensola et al 2012	Familiar Square		12.7518	4.63238			9.73922		1.21533	1.00782			0.754425
Stensola et al 2012	Familiar Square		21.1985	18.334					2.94069	2.36558
Stensola et al 2012	Familiar Square		19.8843	19.3172			20.5836		2.36848	3.24742			2.88472
Stensola et al 2012	Familiar Square		13.7141	10.8225			16.3122		1.67193	1.86294			2.45101
Stensola et al 2012	Familiar Square		32.7176	28.4403			21.4913		6.16213	5.80006			1.81914
Stensola et al 2012	Familiar Square		22.8231	29.4474			31.9471		1.98669	3.8735			3.12721
Stensola et al 2012	Familiar Square		17.5329	23.03			17.8124		1.88371	3.7946			3.02639
Stensola et al 2012	Familiar Square		7.11764	10.4941			7.79435		1.10458	2.6239			1.66356
Stensola et al 2012	Familiar Square		8.01102	7.56232			13.0225		1.23087	1.44556			2.18244
Stensola et al 2012	Familiar Square		12.1294	12.8341			17.8383		2.64535	4.13945			2.92296
Stensola et al 2012	Familiar Square		35.3479	20.7359			24.3985		2.09161	2.88858			2.42928
Stensola et al 2012	Familiar Square		17.8656	14.4858			14.7782		4.46689	4.62554			2.37539
Stensola et al 2012	Familiar Square		21.1358	18.3007			18.3404		5.23242	4.92204			5.17667
Stensola et al 2012	Familiar Square		24.8044	14.6672					3.28459	2.8135
Stensola et al 2012	Familiar Square		34.7036	31.7151			28.7359		12.1067	14.2584			11.073
Stensola et al 2012	Familiar Square		19.5073	21.3633			32.5521		2.17904	3.24997			2.17723
Stensola et al 2012	Familiar Square		13.552	14.2165			10.4687		2.18196	3.50956			3.16024
Stensola et al 2012	Familiar Square		14.01	11.6401			10.7888		0.94817	1.17452			0.832648
Stensola et al 2012	Familiar Square		12.0339	14.0891			7.97857		2.26259	3.58718			1.46452
Stensola et al 2012	Familiar Square		11.0001	7.54384			9.84694		2.527	1.82658			2.05207
Stensola et al 2012	Familiar Square		16.6349	13.0684			15.6112		3.25052	2.9874			2.5272
Stensola et al 2012	Familiar Square		16.2267	18.0147			19.4294		4.23908	5.37529			6.5406
Stensola et al 2012	Familiar Square		12.1064	12.7956			21.6479		0.539215	1.0878			1.34151
Stensola et al 2012	Familiar Square		8.27518	17.259			23.3443		2.2155	5.49332			10.0266
Stensola et al 2012	Familiar Square			7.41894			7.78389			2.09322			1.62316
Stensola et al 2012	Familiar Square			22.593			23.1832			4.68745			5.2984
Stensola et al 2012	Familiar Square			16.9123			25.7602			6.30429			11.8707
Stensola et al 2012	Familiar Square		13.2104	8.48759			29.6889		3.89006	3.04982			8.14193
Stensola et al 2012	Familiar Square		15.5232	13.0053			16.202		1.94018	3.16284			3.29971
Stensola et al 2012	Familiar Square		13.6768	9.94436			11.6734		1.54875	1.06476			2.05639
Stensola et al 2012	Familiar Square		4.16196	3.61308			14.8583		0.650231	0.543852			1.10795
Stensola et al 2012	Familiar Square		6.41728	6.04386			19.7675		1.14923	1.73948			5.91913
Stensola et al 2012	Familiar Square		13.2029	11.8918			13.0938		2.61629	2.50597			3.47043
Stensola et al 2012	Familiar Square		25.4094	30.2579			36.01		7.24959	7.0004			7.93586
Stensola et al 2012	Familiar Square			50.8308			24.1335			20.2381			8.45233
Stensola et al 2012	Familiar Square			16.8817			26.2811			4.5777			5.33455
Stensola et al 2012	Familiar Square		13.8554	16.3155			17.0839		2.54463	1.96083			1.81974
Stensola et al 2012	Familiar Square		28.0357	21.525			35.4936		2.4575	3.27468			4.00186
Stensola et al 2012	Familiar Square		12.9163	20.1713					2.27256	3.08108
Stensola et al 2012	Familiar Square		12.919	13.6969					1.57906	2.01875
Stensola et al 2012	Familiar Square		30.5454	22.6841			27.9827		6.33757	5.08659			5.81845
Stensola et al 2012	Familiar Square		19.6749	23.5506			23.1516		7.70146	8.17097			8.91753
Stensola et al 2012	Familiar Square		20.1317	11.6544			31.9269		6.61852	3.02151			7.85404
Stensola et al 2012	Familiar Square		16.4615	11.2465			14.162		3.8285	3.72145			3.48036
Barry et al 2007	Familiar Square		2.50628	2.18698	3.8833	1.79709	3.39714		0.315839	0.361673	0.445007	0.395007	0.505008
Barry et al 2007	Familiar Square		2.92873	1.67322	2.4797	1.33976	2.95792		0.493342	0.491675	0.536676	0.458341	0.581676
Barry et al 2007	Familiar Square		3.76595	4.94212	4.78352	2.37591	4.49554		0.41084	0.644177	0.492508	0.41834	0.545842
Barry et al 2007	Familiar Square		3.8279	5.4279	2.83836	2.54435	3.32187		0.58751	0.723345	0.437507	0.581676	0.522509
Barry et al 2007	Familiar Square		3.41805	2.07747	3.01708	1.37914	2.15666		0.450008	0.377506	0.567509	0.318339	0.516675
Barry et al 2007	Familiar Square		4.92682	5.42416	7.80684	6.45632	4.5665		0.615844	0.57251	0.565009	0.641677	0.374173
Barry et al 2007	Familiar Square		11.8109	10.0749	8.91694	11.7829	8.68355		1.8917	1.47002	1.48586	1.74586	1.15669
Barry et al 2007	Familiar Square		7.69287	7.53502	5.04347	5.2563	9.11988		1.08168	1.11585	1.22835	1.18919	1.27835
Barry et al 2007	Familiar Square		7.34751	5.51908	8.24147	5.46255	9.89487		1.37419	0.924182	1.46669	1.21085	1.54586
Barry et al 2007	Familiar Square		6.75914	4.98478	5.42177	3.31398	7.62351		0.650844	0.62501	0.506675	0.544176	0.652511
Barry et al 2007	Familiar Square		6.87258	8.11227	9.57711	7.43023	12.6168		1.48252	1.8067	1.02418	1.48336	1.74836
Barry et al 2007	Familiar Square		16.7876	12.5721	9.28756	6.29116	13.6833		3.93423	2.78171	2.57004	2.45421	2.2942
Barry et al 2007	Familiar Square		15.4288	9.88634	11.3839	7.91694	10.6852		1.62419	1.58503	1.40252	1.41502	1.41169
Barry et al 2007	Familiar Square		9.91619	7.8454	9.07297	6.79769	15.033		1.7742	1.63086	1.57871	1.70753	2.50921
Barry et al 2007	Familiar Square		16.185	4.38223	12.5051	12.3302	6.16238		2.0967	0.700012	2.01253	2.23087	1.07752
Barry et al 2007	Familiar Square		3.63563	2.11756	2.2079	1.5958	2.73287		0.78168	0.449174	0.871681	0.523342	0.656678
Barry et al 2007	Familiar Square		11.3824	12.7424	13.8502	7.76761	15.254		1.10252	1.87836	1.52669	1.1882	1.16419
Barry et al 2007	Familiar Square		3.07436	1.02475	2.03024	1.40504	3.5242		0.655844	0.319172	0.708345	0.371673	0.890015
Barry et al 2007	Familiar Square		6.4653	6.70987	6.88096	3.68745	7.30215		0.502508	0.637511	0.580843	0.715012	0.490842
Barry et al 2007	Familiar Square		5.53859	0.769268	0.965746	1.80788	1.23424		0.533342	0.0991683	0.143336	0.163336	0.0550009
Barry et al 2007	Familiar Square		10.1969	6.73056	6.18202	4.35873	7.96917		1.93087	1.87586	1.74503	1.31002	1.55753
Barry et al 2007	Familiar Square		12.9102	9.35764	5.40621	8.37134	15.8316		1.18169	0.894182	0.709178	0.992517	1.03418
Barry et al 2007	Familiar Square		5.64118	2.9428	4.85744	3.96171	3.5093		1.04168	0.647511	1.18252	1.02418	0.656678
Barry et al 2007	Familiar Rectangle		3.75572	5.41645	4.27259	3.60937	3.33236		1.16335	1.22317	0.787513	0.668344	0.864181
Barry et al 2007	Familiar Rectangle		9.91184	7.656	11.3037	10.2325	14.7149		2.25504	1.60503	2.37306	1.7892	2.56004
Barry et al 2007	Familiar Rectangle		4.37332	2.35811	3.22007	3.61892	3.31249		1.16502	0.77668	0.878449	1.03335	0.923349
Barry et al 2007	Familiar Rectangle		8.81889	6.5725	7.32444	7.05397	7.47631		1.64836	1.11002	1.31336	1.14919	1.09168
Barry et al 2007	Familiar Rectangle		18.786	13.6471	16.6915	18.0601	20.911		3.39589	3.33839	3.80006	3.65089	3.07088
Barry et al 2007	Familiar Rectangle		10.4612	10.6377	10.5267	13.1078	8.3961		3.69173	5.05508	4.11424	3.93257	3.98507
Barry et al 2007	Familiar Rectangle		32.4833	9.89637	13.3095	14.6127	9.89644		7.52302	3.25089	3.74194	3.25755	2.75005
Barry et al 2007	Familiar Rectangle		10.2931	10.6506	16.5108	13.7693	9.01233		4.32424	4.66841	7.08762	4.33674	3.50839
Barry et al 2007	Familiar Rectangle		4.07622	7.76004	8.15354	13.7273	6.13459		0.489175	1.94253	1.11002	1.51753	1.18002
Barry et al 2007	Familiar Rectangle		8.64047	5.32197	5.70113	4.54556	6.36231		3.63506	2.26504	2.0617	1.50669	2.51838
Barry et al 2007	Familiar Rectangle		20.786	16.1151	29.0282	31.9251	20.1058		8.47597	8.14347	8.80181	9.59183	7.26762
Barry et al 2007	Familiar Rectangle		5.36896	3.35812	2.16235	2.75744	7.97947		0.525842	0.60001	0.437507	0.522509	0.459174
Barry et al 2007	Familiar Rectangle		3.41905	2.55042	5.00365	4.30738	2.74962		0.650844	0.634177	0.822514	0.581676	0.446674
