# Supplementary material for: Environmental deformations dynamically shift the grid cell spatial metric
Source: eLife journal article supplement (doi:10.7554/elife.38169), 2018-10-22
Supplement: supp [file elife-38169-supp-v1.zip › elife_poa_e38169_Figure_3_source_data_4.xls]

## Sheet: Sheet1
Rat_214	1_06-03-10	hr	3_1	0.38203	0.714673
Rat_214	1_06-03-10	vr	3_1	0.583412	0.50436
Rat_214	1_06-03-10	ss	3_1	0.446527	0.431608
Rat_214	2_06-03-21	hr	2_1	0.246758	0.417919
Rat_214	2_06-03-21	vr	2_1	0.523182	0.414751
Rat_214	2_06-03-21	ss	2_1	0.156251	0.343893
Rat_214	4_06-03-31	hr	1_1	0.203873	0.339965
Rat_214	4_06-03-31	vr	1_1	0.659467	0.569303
Rat_214	4_06-03-31	ss	1_1	0.67969	0.438912
Rat_214	5_06-04-04	hr	1_2	0.477345	0.641434
Rat_214	5_06-04-04	vr	1_2	0.610412	0.621208
Rat_214	5_06-04-04	ss	1_2	0.700952	0.71101
Rat_214	5_06-04-04	hr	1_4	0.0963129	0.350484
Rat_214	5_06-04-04	vr	1_4	0.488793	0.451074
Rat_214	5_06-04-04	ss	1_4	0.549625	0.363305
Rat_214	5_06-04-04	hr	1_5	0.46164	0.700153
Rat_214	5_06-04-04	vr	1_5	0.64963	0.563725
Rat_214	5_06-04-04	ss	1_5	0.561085	0.561345
Rat_216	10_06-08-30	hr	4_1	0.685976	0.774448
Rat_216	10_06-08-30	vr	4_1	0.722559	0.651805
Rat_216	10_06-08-30	ss	4_1	0.622429	0.567834
Rat_216	10_06-08-30	hr	4_2	0.666704	0.793034
Rat_216	10_06-08-30	vr	4_2	0.737487	0.697114
Rat_216	10_06-08-30	ss	4_2	0.697648	0.619682
Rat_216	5_06-06-22	hr	3_1	0.597524	0.783958
Rat_216	5_06-06-22	vr	3_1	0.729342	0.746183
Rat_216	5_06-06-22	ss	3_1	0.410443	0.663794
Rat_216	6_06-07-12	hr	4_1	0.614636	0.790531
Rat_216	6_06-07-12	vr	4_1	0.843126	0.80209
Rat_216	6_06-07-12	ss	4_1	0.502116	0.712697
Rat_216	6_06-07-12	hr	4_3	0.63217	0.753034
Rat_216	6_06-07-12	vr	4_3	0.618258	0.56042
Rat_216	6_06-07-12	ss	4_3	0.593596	0.738308
Rat_216	8_06-07-25	hr	2_1	0.547412	0.780196
Rat_216	8_06-07-25	vr	2_1	0.776786	0.778628
Rat_216	8_06-07-25	ss	2_1	0.274696	0.725111
Rat_216	9_06-08-21	hr	4_1	0.556954	0.582989
Rat_216	9_06-08-21	vr	4_1	0.944379	0.9208
Rat_216	9_06-08-21	ss	4_1	0.882897	0.760462
Rat_217	1_06-05-18	hr	4_1	0.501409	0.836286
Rat_217	1_06-05-18	vr	4_1	0.832901	0.784081
Rat_217	1_06-05-18	ss	4_1	0.612411	0.541762
Rat_217	11_06-07-25	hr	1_1	0.718982	0.743757
Rat_217	11_06-07-25	vr	1_1	0.566048	0.425767
Rat_217	11_06-07-25	ss	1_1	0.453025	0.368116
Rat_217	12_06-07-31	hr	3_3	0.389831	0.47538
Rat_217	12_06-07-31	vr	3_3	0.536949	0.485455
Rat_217	12_06-07-31	ss	3_3	0.349753	0.451569
Rat_217	13_06-08-01	hr	4_1	0.640034	0.858564
Rat_217	13_06-08-01	vr	4_1	0.911187	0.878077
Rat_217	13_06-08-01	ss	4_1	0.565201	0.80284
Rat_217	14_06-08-09	hr	3_1	0.609499	0.63603
Rat_217	14_06-08-09	vr	3_1	0.710231	0.644304
Rat_217	14_06-08-09	ss	3_1	0.720836	0.543011
Rat_217	14_06-08-09	hr	4_1	0.638769	0.831802
Rat_217	14_06-08-09	vr	4_1	0.902805	0.843879
Rat_217	14_06-08-09	ss	4_1	0.594348	0.729577
Rat_217	2_06-05-23	hr	4_4	0.77905	0.743391
Rat_217	2_06-05-23	vr	4_4	0.82816	0.808919
Rat_217	2_06-05-23	ss	4_4	0.658166	0.734093
Rat_217	4_06-05-26	hr	4_1	0.60083	0.76031
Rat_217	4_06-05-26	vr	4_1	0.787082	0.777652
Rat_217	4_06-05-26	ss	4_1	0.64888	0.664896
Rat_217	6_06-07-05	hr	2_1	0.633269	0.934704
Rat_217	6_06-07-05	vr	2_1	0.847165	0.878019
Rat_217	6_06-07-05	ss	2_1	0.764972	0.724776
Rat_217	7_06-07-11	hr	1_1	0.5669	0.570322
Rat_217	7_06-07-11	vr	1_1	0.663924	0.597262
Rat_217	7_06-07-11	ss	1_1	0.39238	0.433877
Rat_228	1_06-07-10	ss	1_4	0.373176	0.521964
Rat_228	4_06-09-03	ss	1_3	0.447555	0.297508
Rat_228	4_06-09-03	ss	1_5	0.38226	0.393606
Rat_228	5_06-09-05	ss	1_4	0.268213	0.389272
Rat_236	10_06-09-10	ss	3_1	0.708827	0.26444
Rat_236	2_06-08-14	ss	1_1	0.710403	0.610711
Rat_236	4_06-08-19	ss	3_2	0.518019	0.430862
Rat_236	6_06-08-23	ss	3_3	0.694295	0.506464
Rat_236	6_06-08-23	ss	4_3	0.451757	0.267719
Rat_236	8_06-09-01	ss	4_3	0.659553	0.790676
Rat_236	9_06-09-06	ss	2_3	0.672124	0.616297
Rat_407	1_06-10-30	ss	1_1	0.50216	0.587706
Rat_407	1_06-10-30	ss	1_2	0.555161	0.799325
Bolla (15687)	Session_1	hr	1_1	0.613126	0.345204
Bolla (15687)	Session_1	hr	1_2	0.641776	0.264068
Bolla (15687)	Session_1	hr	1_3	0.540943	0.362615
Flekken (14147)	Session_1	hr	1_1	0.337406	0.160065
Flekken (14147)	Session_1	hr	1_2	0.751728	0.475531
Flekken (14147)	Session_1	hr	1_3	0.558648	0.474299
Flekken (14147)	Session_1	hr	1_4	0.646209	0.51467
Flekken (14147)	Session_1	hr	1_5	0.336587	0.381255
Flekken (14147)	Session_1	hr	1_6	0.824236	0.601427
Flekken (14147)	Session_1	hr	1_7	0.70252	0.312089
Flekken (14147)	Session_1	hr	1_8	0.623058	0.15808
Flekken (14147)	Session_1	hr	1_9	0.683014	0.298
Flekken (14147)	Session_1	hr	1_10	0.629804	0.419388
Flekken (14147)	Session_1	hr	1_11	0.703972	0.271594
Flekken (14147)	Session_1	hr	1_12	0.592064	0.382211
Flekken (14147)	Session_1	hr	1_13	0.523638	0.237217
Flekken (14147)	Session_1	hr	1_14	0.435407	0.298671
Flekken (14147)	Session_1	hr	1_15	0.562897	0.824876
Flekken (14147)	Session_1	hr	1_16	0.641745	0.724094
Flekken (14147)	Session_1	hr	1_17	0.684197	0.725278
Flekken (14147)	Session_1	hr	1_18	0.760757	0.638294
Flekken (14147)	Session_1	hr	1_19	0.82202	0.576763
Flekken (14147)	Session_1	hr	1_20	0.560865	0.713092
Flekken (14147)	Session_1	hr	1_21	0.719619	0.732974
Flekken (14147)	Session_1	hr	1_22	0.513064	0.532852
Flekken (14147)	Session_1	hr	1_23	0.653453	0.656318
Joppe (15708)	Session_1	hr	1_1	0.52464	0.498499
Joppe (15708)	Session_1	hr	1_2	0.703654	0.80508
Joppe (15708)	Session_1	hr	1_5	0.59856	0.290656
Joppe (15708)	Session_1	hr	1_7	0.75853	0.712713
Joppe (15708)	Session_1	hr	1_8	0.7674	0.647559
Joppe (15708)	Session_1	hr	1_3	0.585548	0.615055
Joppe (15708)	Session_1	hr	1_4	0.700102	0.159968
Joppe (15708)	Session_1	hr	1_6	0.661041	0.330649
Joppe (15708)	Session_2	hr	1_2	0.601016	0.421057
Joppe (15708)	Session_2	hr	1_3	0.649318	0.226177
Joppe (15708)	Session_2	hr	1_4	0.604316	0.123257
Joppe (15708)	Session_2	hr	1_5	0.513082	0.223094
Joppe (15708)	Session_2	hr	1_6	0.633795	0.0487994
Joppe (15708)	Session_2	hr	1_7	0.630578	0.281988
Joppe (15708)	Session_2	hr	1_8	0.688502	0.341371
Joppe (15708)	Session_2	hr	1_1	0.778185	0.515158
Joppe (15708)	Session_2	hr	1_9	0.661285	0.265065
Kvek (15314)	Session_1	hr	1_1	0.485255	0.209736
Kvek (15314)	Session_1	hr	1_2	0.523052	0.560604
Kvek (15314)	Session_1	hr	1_3	0.470991	0.585452
Kvek (15314)	Session_1	hr	1_4	0.422247	0.558645
Kvek (15314)	Session_1	hr	1_5	0.424485	0.435773
Kvek (15314)	Session_1	hr	1_6	0.675885	0.487383
Kvek (15314)	Session_1	hr	1_7	0.561533	0.336115
Kvek (15314)	Session_1	hr	1_8	0.506304	0.388963
