# Supplementary figures and images for: Environmental deformations dynamically shift the grid cell spatial metric
Source: eLife journal article supplement (doi:10.7554/elife.38169), 2018-10-22

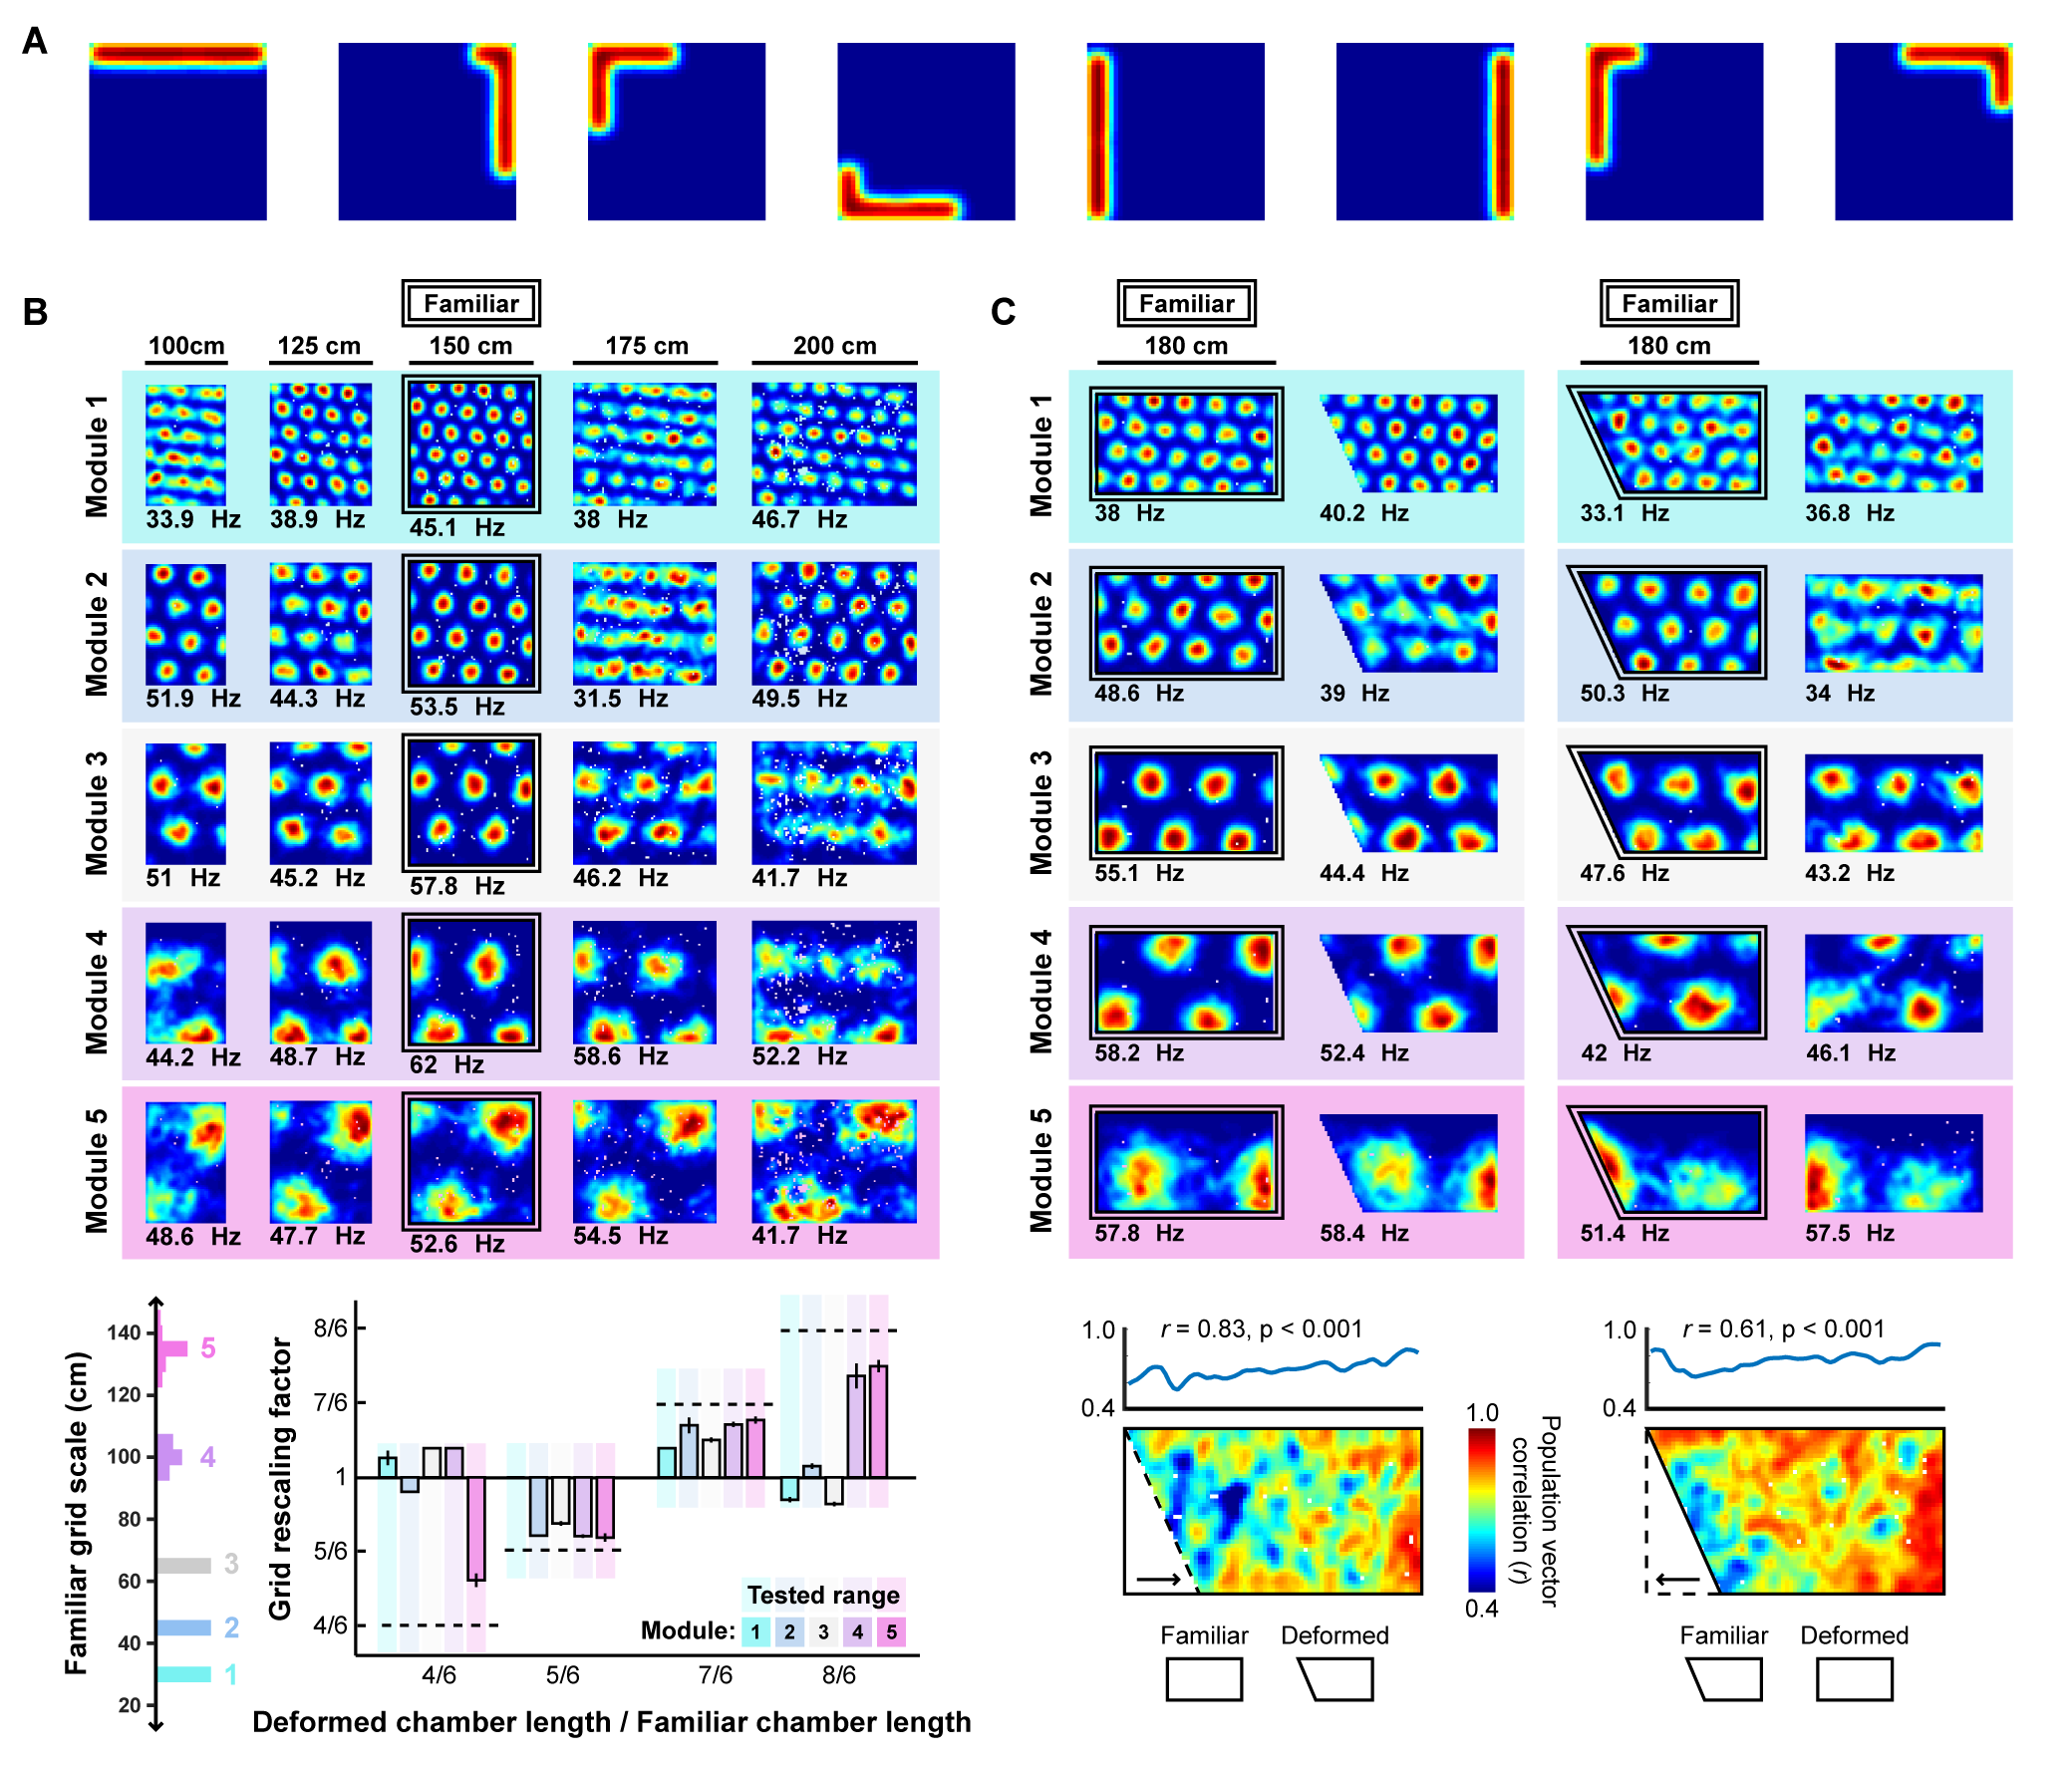

Supplement: supp [file elife-38169-supp-v1.zip › elife_poa_e38169_Figure_5_figure_supplement_1.tif]

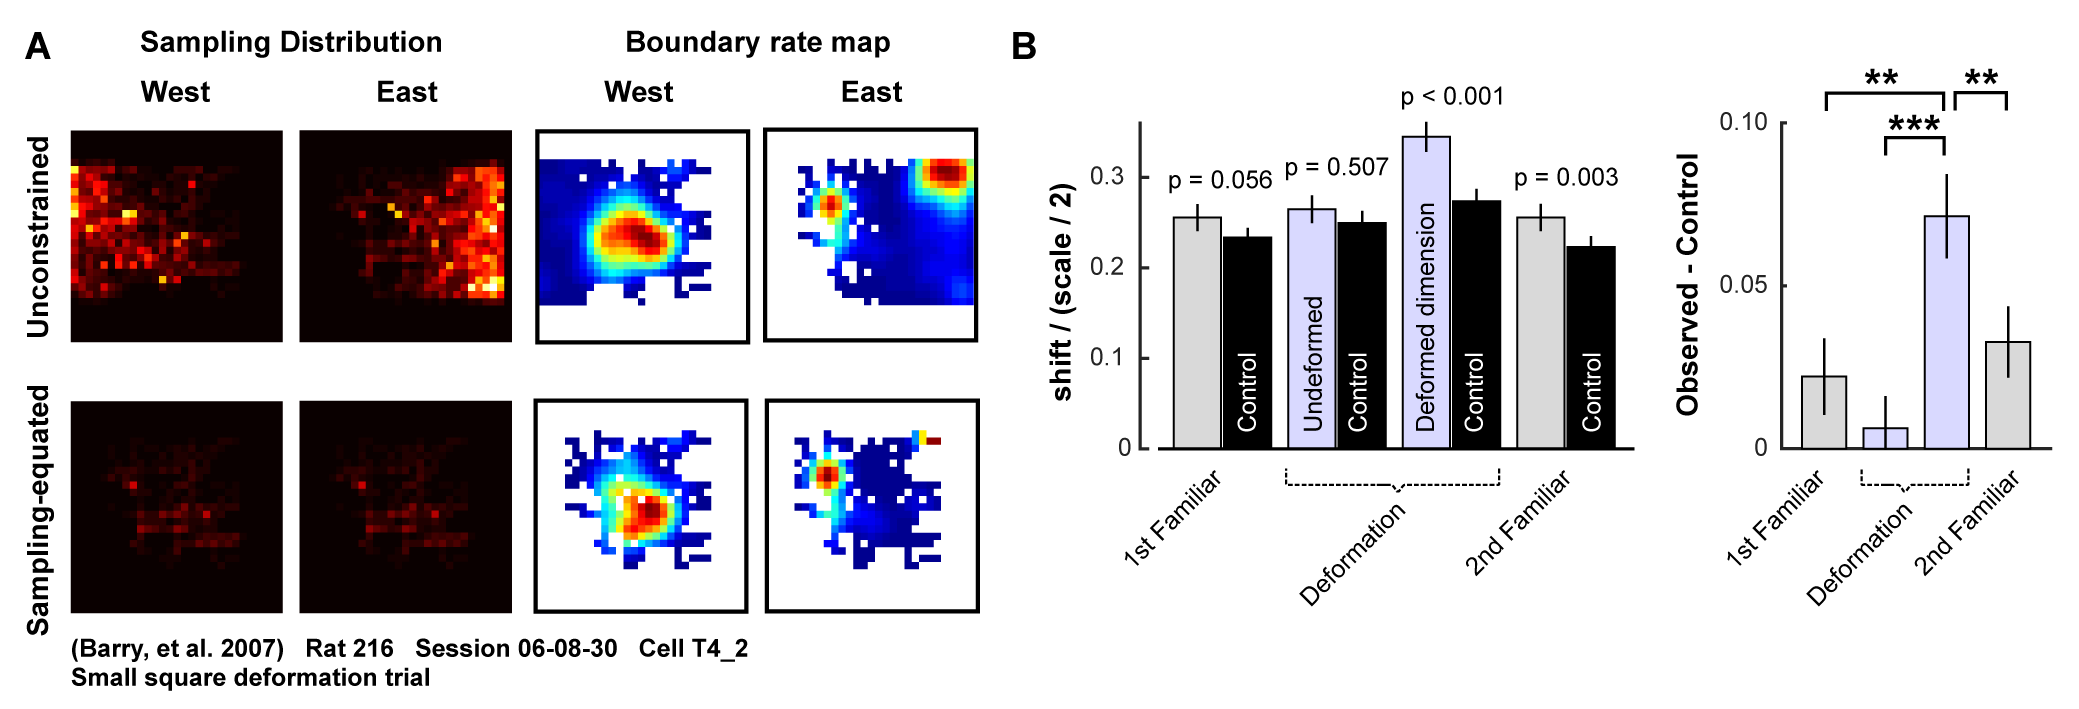

Supplement: supp [file elife-38169-supp-v1.zip › elife_poa_e38169_Figure_2_figure_supplement_1.tif]

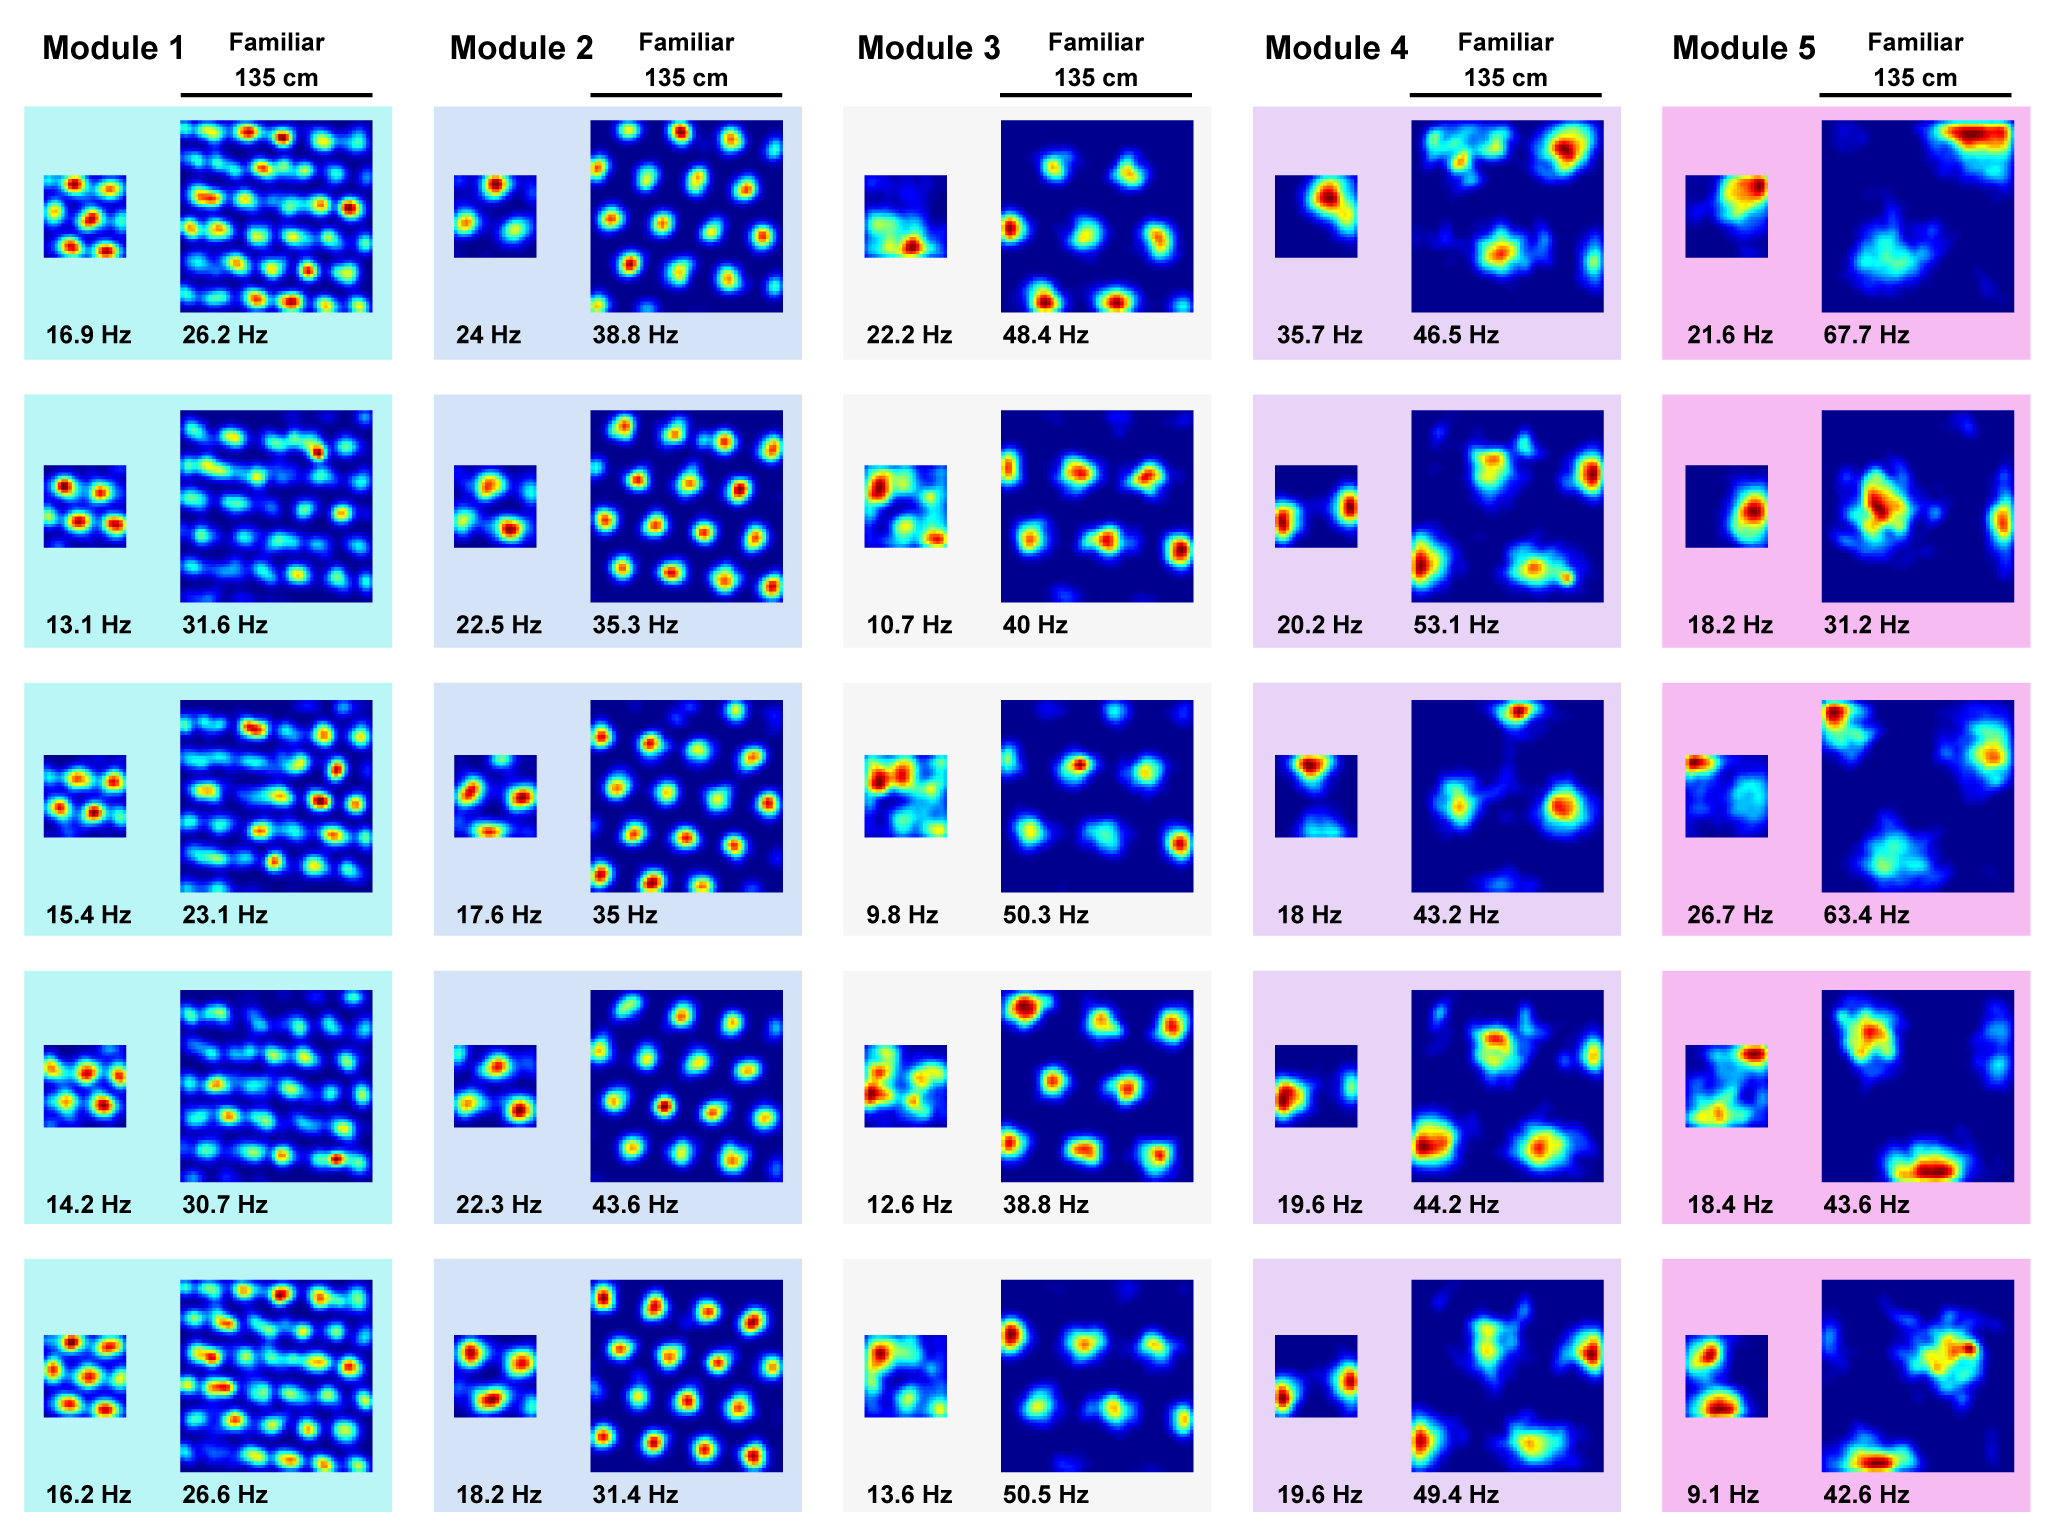

Supplement: supp [file elife-38169-supp-v1.zip › elife_poa_e38169_Figure_5_figure_supplement_3.tif]

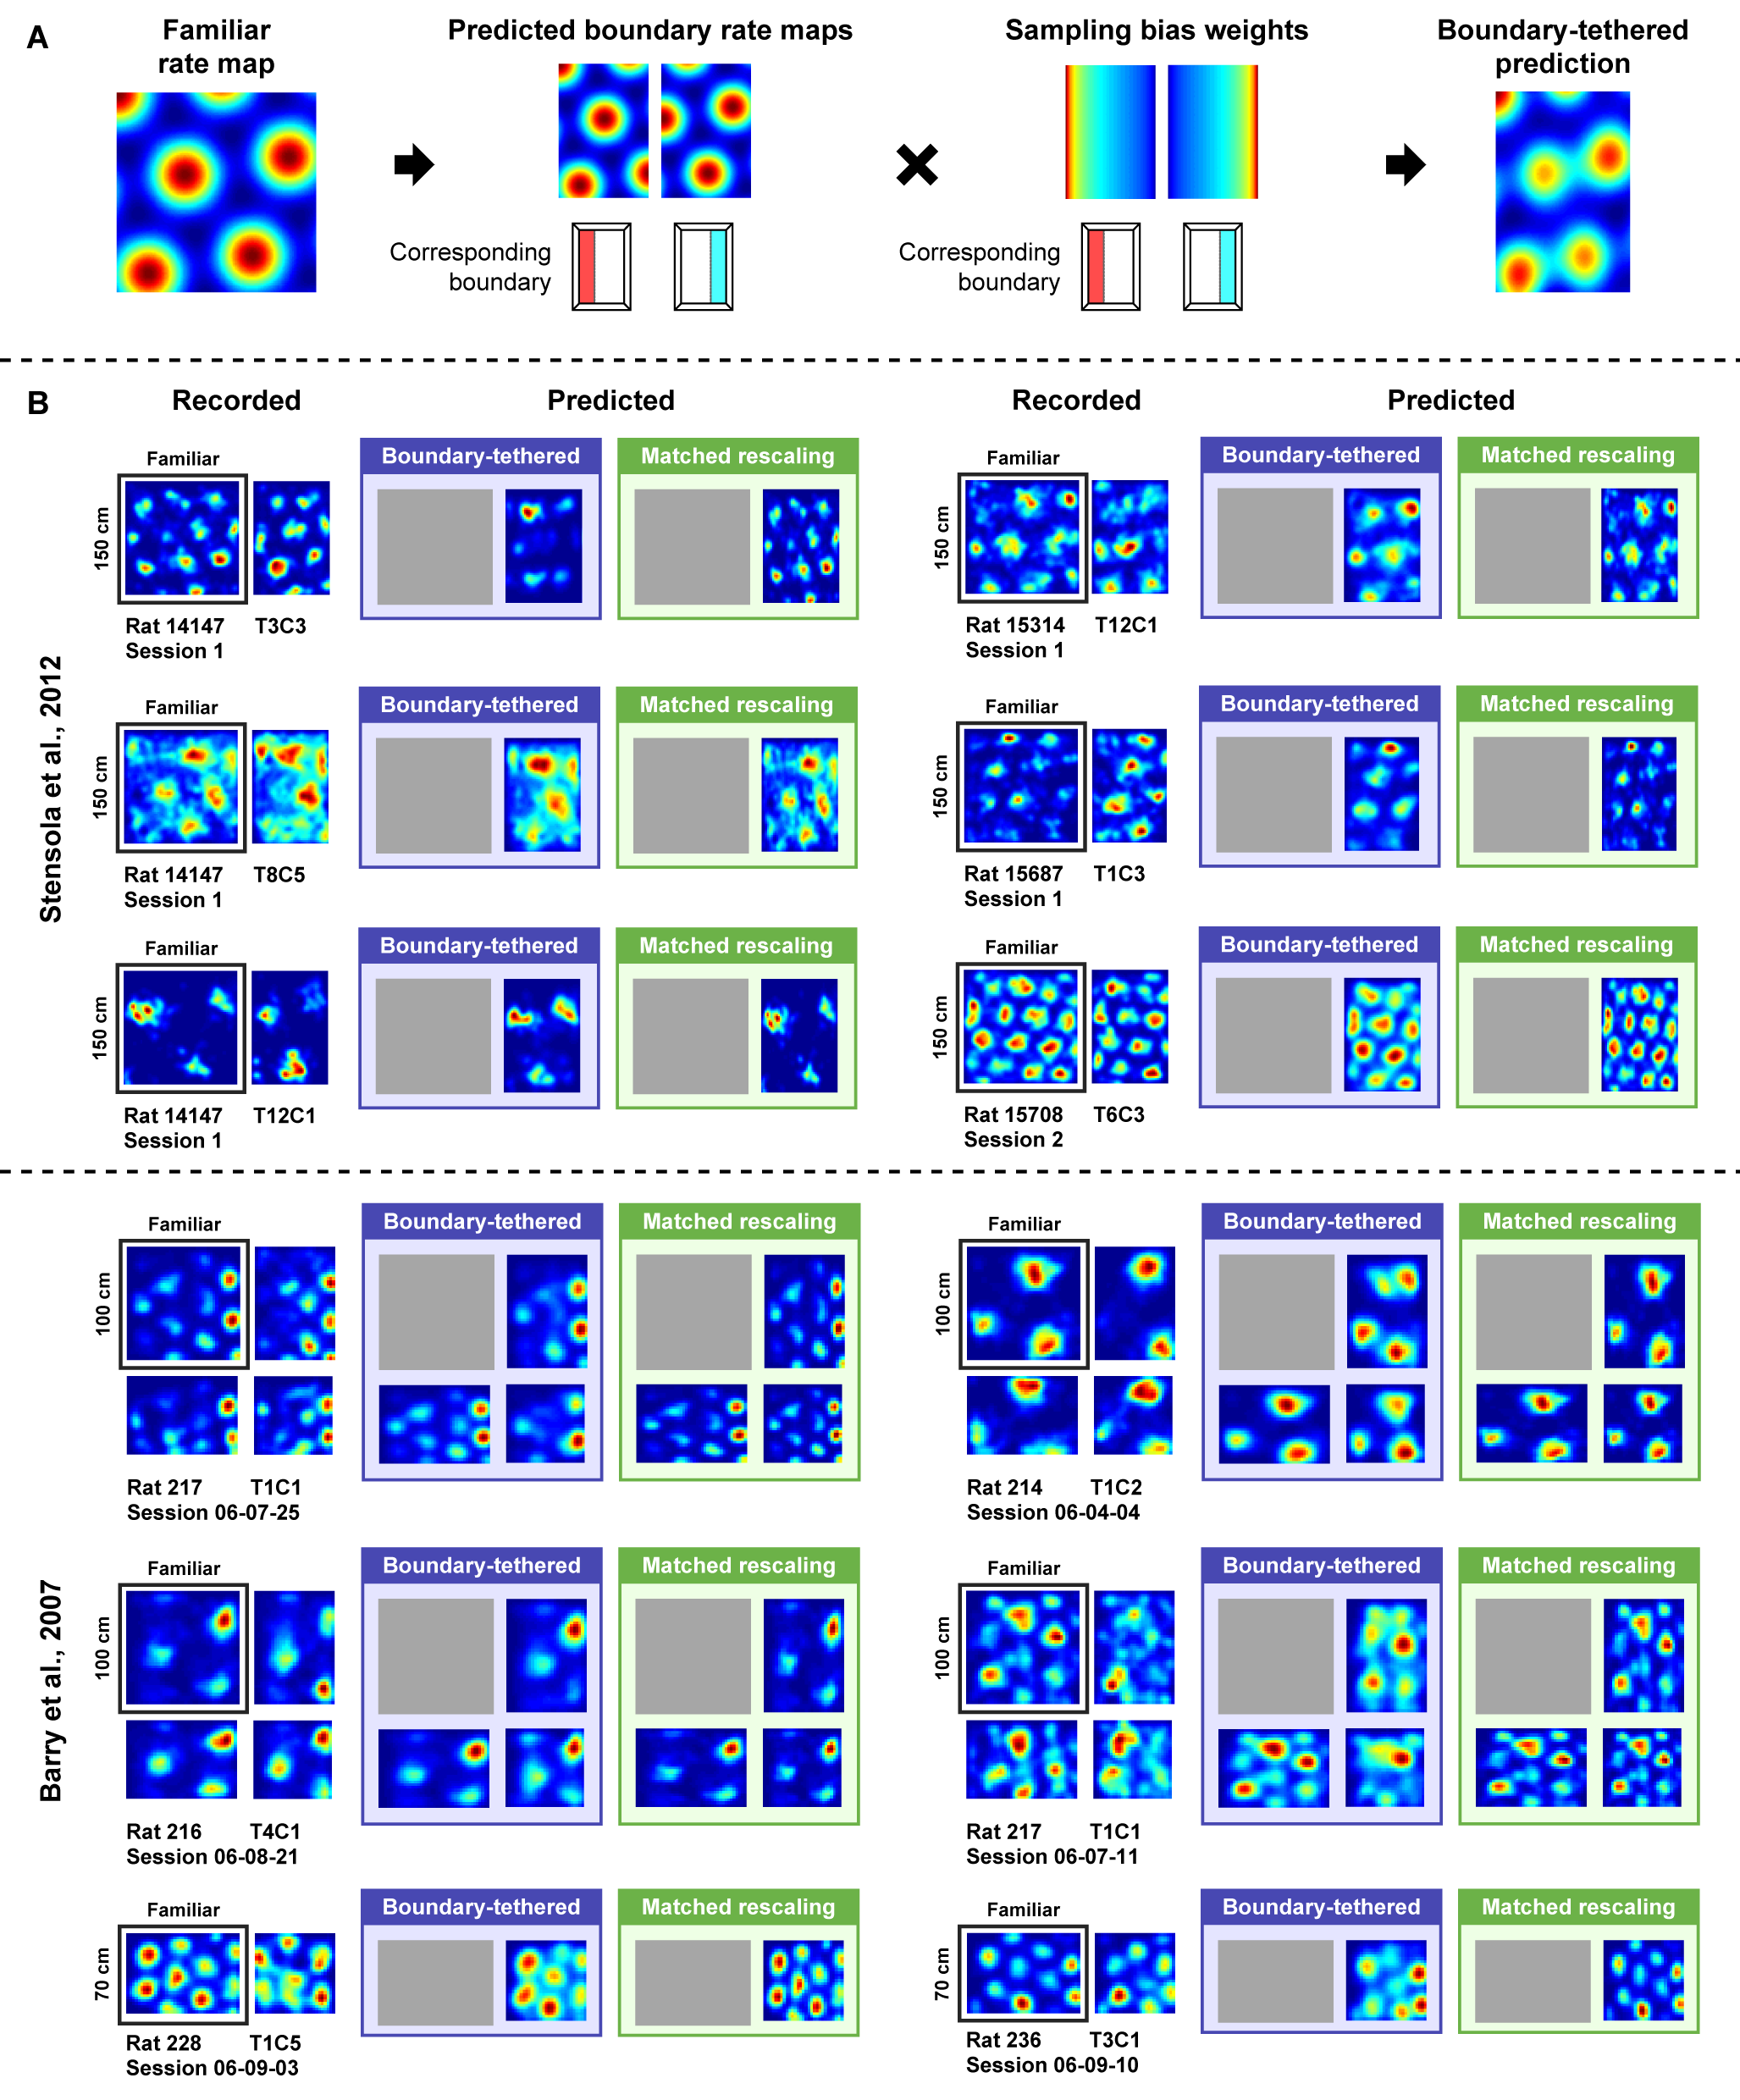

Supplement: supp [file elife-38169-supp-v1.zip › elife_poa_e38169_Figure_3_figure_supplement_1.tif]

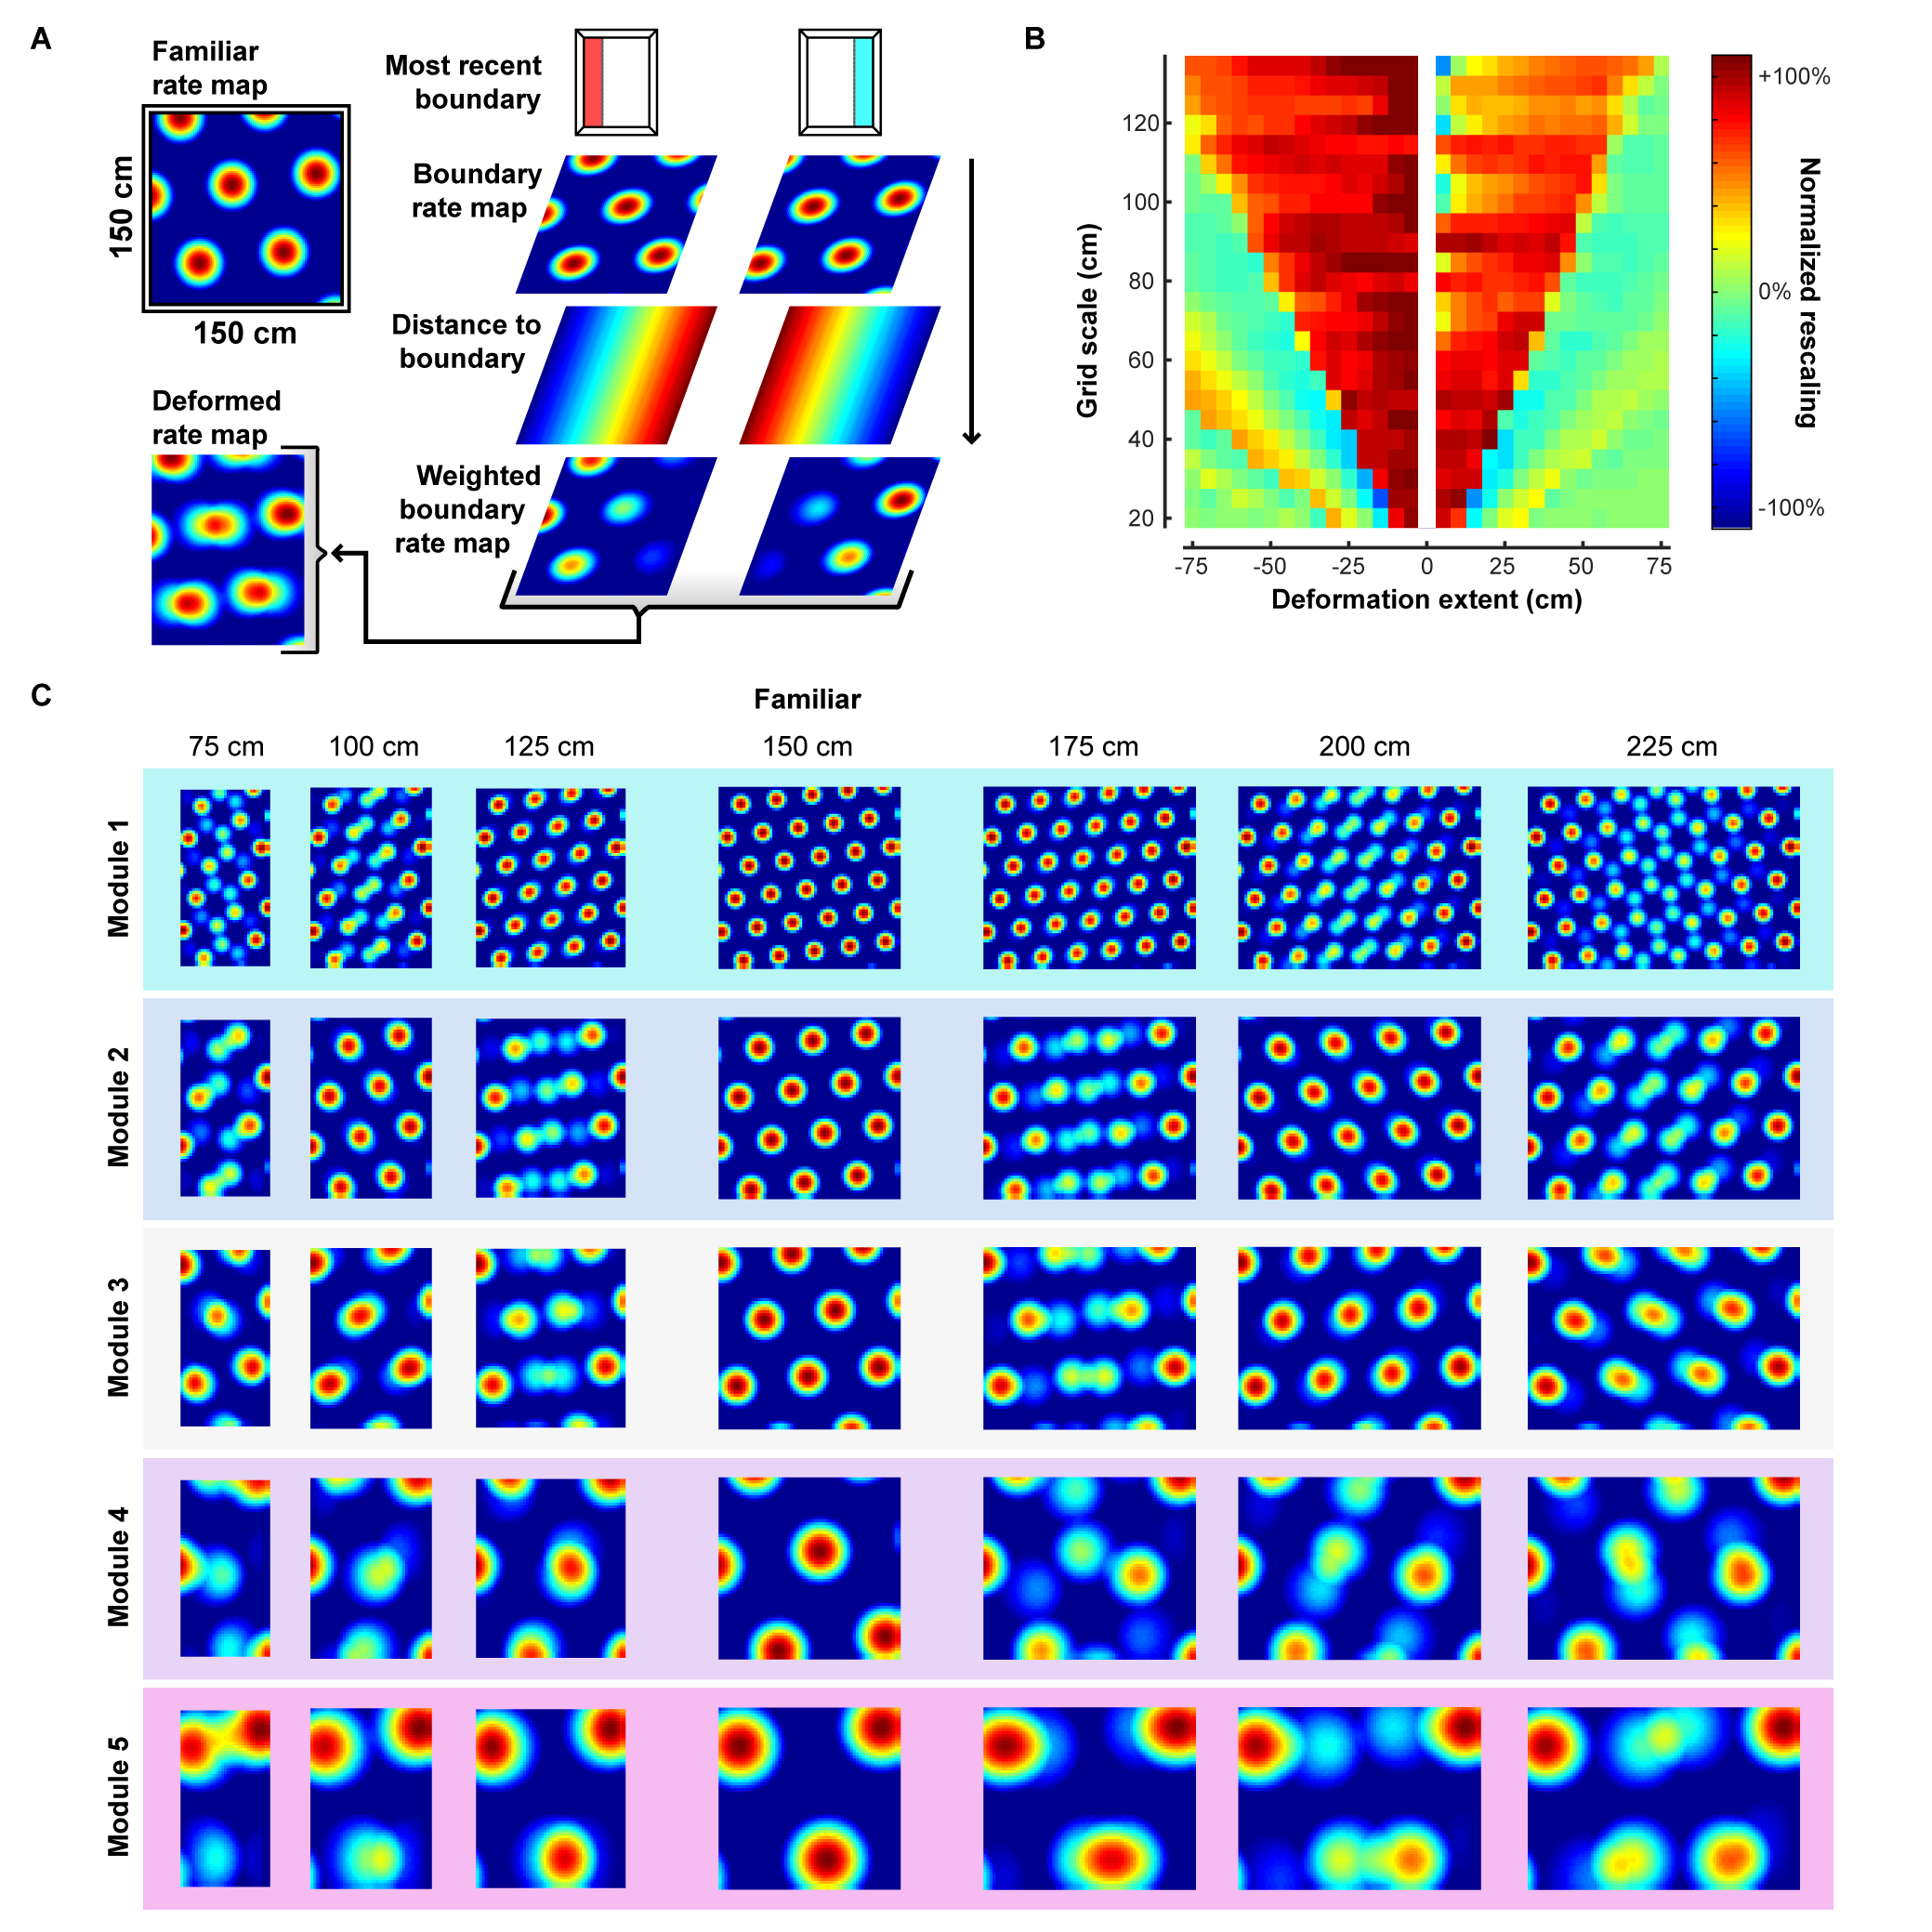

Supplement: supp [file elife-38169-supp-v1.zip › elife_poa_e38169_Figure_5_figure_supplement_2.tif]
